# Supplementary material for: Human microbiome signatures of differential colorectal cancer drug metabolism
Source: PubMed Central journal article supplement (PMC5665930; doi:10.1038/s41522-017-0034-1), 2017-11-01
Supplement: 41522_2017_34_MOESM1_ESM.pdf [file 41522_2017_34_MOESM1_ESM.pdf]

## Supplementary Information

### Human microbiome signatures of differential colorectal cancer drug metabolism

Leah Guthrie, Sanchit Gupta<sup>2</sup>, Johanna Daily<sup>2</sup>, Libusha Kelly<sup>1,2</sup>  
<sup>1</sup>Systems and Computational Biology; <sup>2</sup>Microbiology and Immunology at Albert Einstein  
College of Medicine

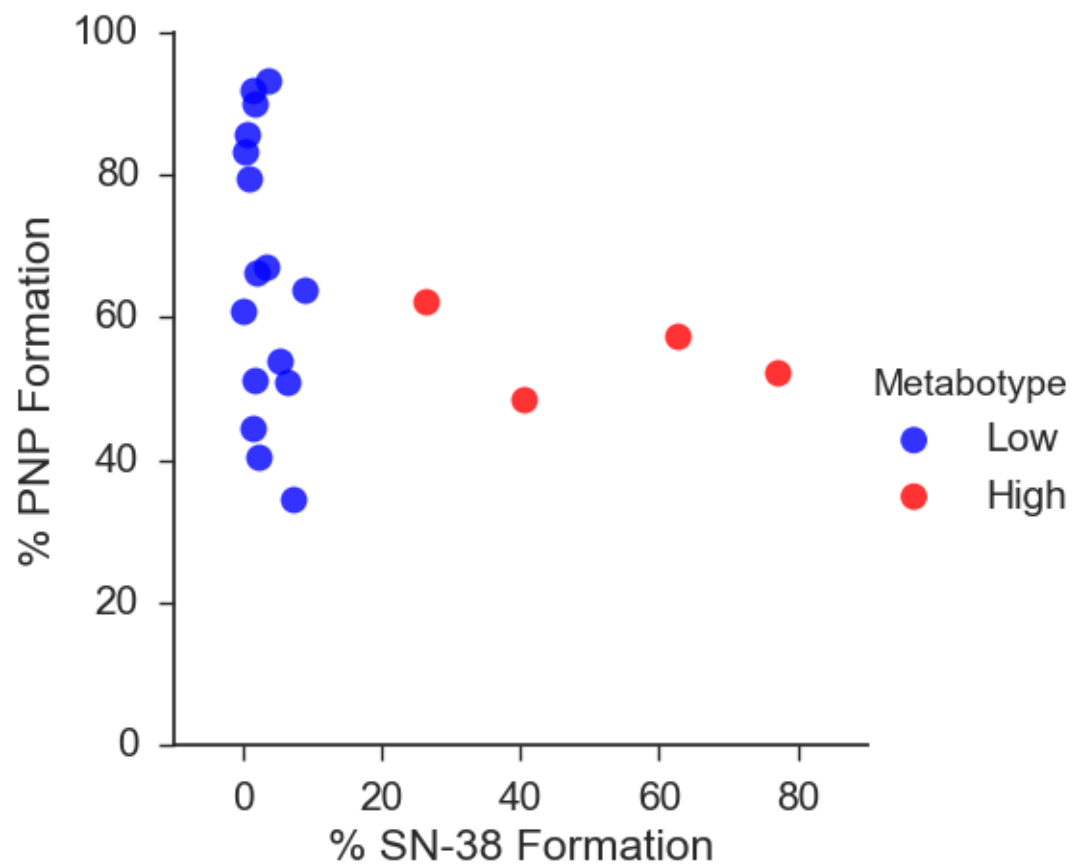

(a)

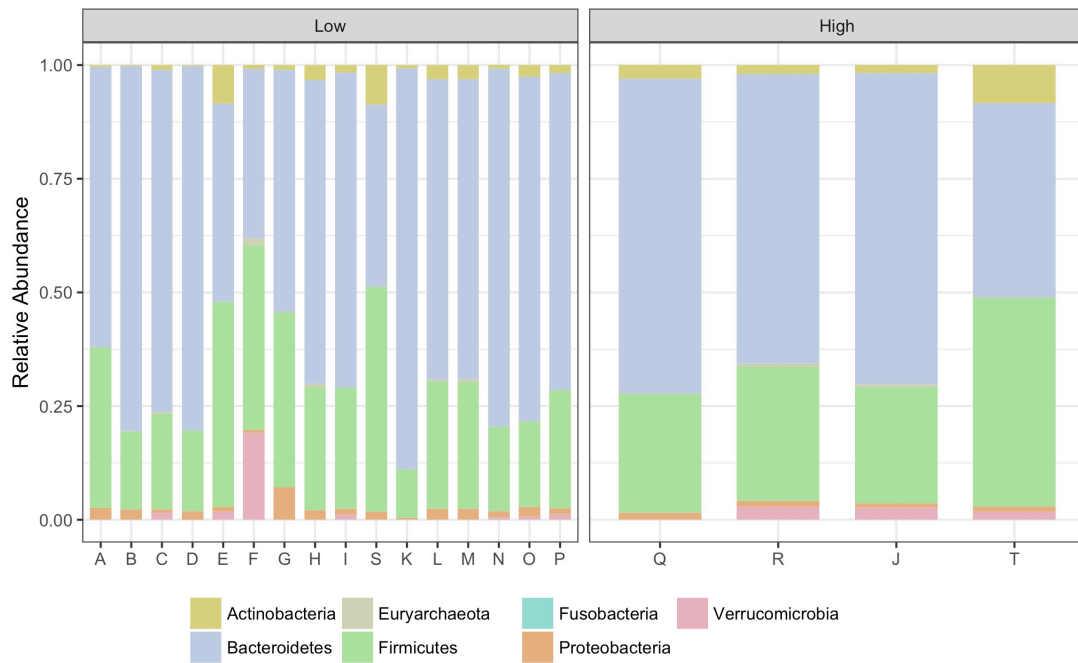

(b)

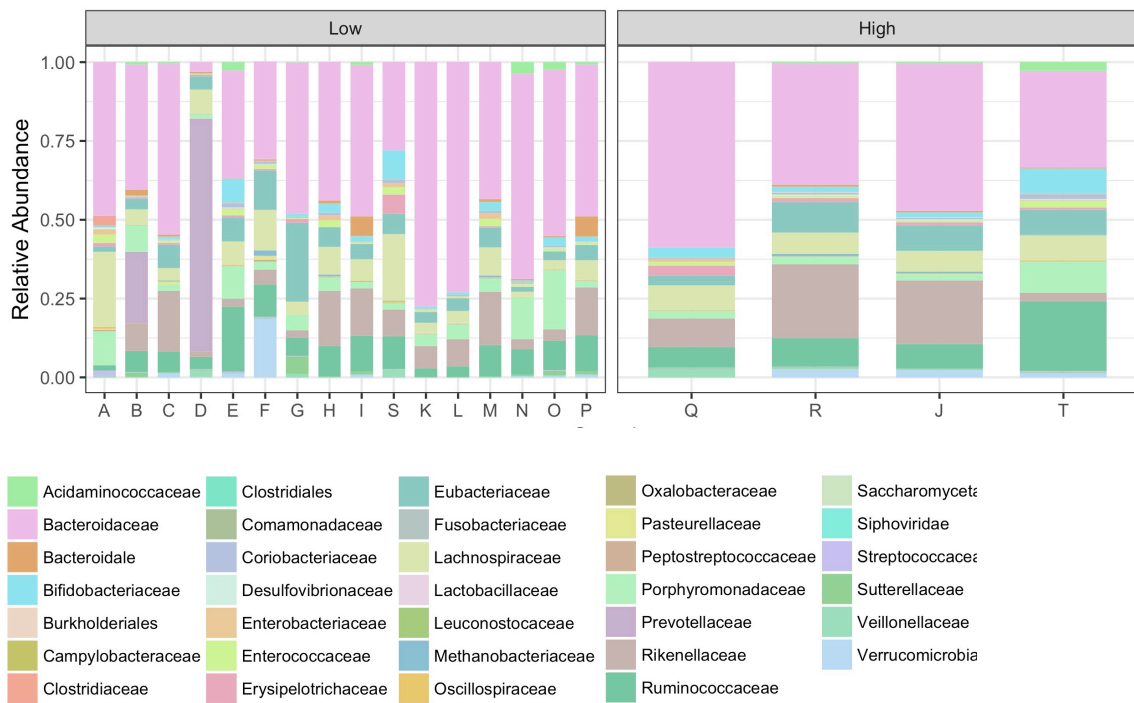

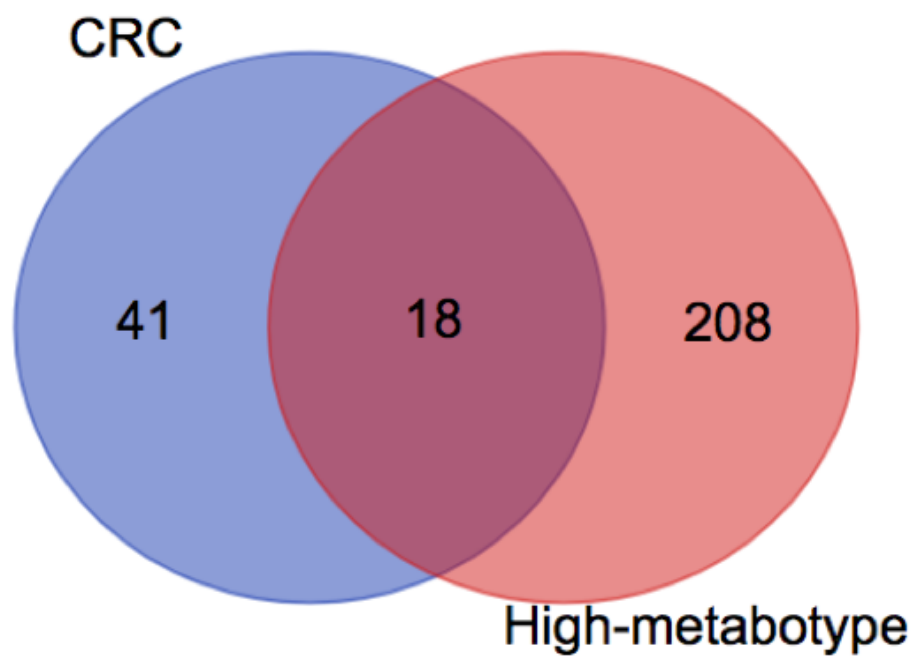

## Supplementary Figure Legends

**Figure S1.** No correlation between assays of BG activities of human fecal extracts using p-NPG and SN-38G as substrates. The 20 healthy fecal samples were processed as described for LC-MS/MS analysis. The conversion of p-Nitrophenyl  $\beta$ -D-glucuronide (PNPG) to p-Nitrophenyl (PNP) was determined using a plate-based absorbance assay as described by *Wallace et al, 2010*.

**Figure S2.** Microbial carriage is uniform at (a) the Phylum level, while variable at (b) the family level, but unlinked to metatypes. Taxonomic abundance was determined using MetaPhlan and collapsed at the level of Phylum and family. Statistical differences between the stratified metabolizer phenotypes, low and high, were determined using STAMP's implementation of the Welch's t-test with a Storey FDR, adjusted q-value < 0.05 and followed an effect size filter (ratio of proportions effect size < 2.00).

**Figure S3.** High metabotype participants and carcinoma patients carry overlapping sets of BGs. To examine the distribution of BGs in a colorectal cancer patient cohort, gene calls from the Feng et al, 2015 shotgun metagenomic study of patients with advanced adenomas, carcinomas and age matched controls, were compared to a database of cultured and metagenomically identified BGs. BGs carried by both high metabotype participants and carcinoma patients were identified and plotted in a Venn diagram.

Table S1. Participant characteristics

| <b>ID</b> | <b>AGE</b> | <b>SEX</b> | <b>BMI</b>  |
|-----------|------------|------------|-------------|
| A         | 25         | Female     | Normal      |
| B         | 23         | Female     | Normal      |
| C         | 24         | Female     | Normal      |
| D         | 25         | Male       | Normal      |
| E         | 27         | Female     | Normal      |
| F         | 29         | Female     | Normal      |
| G         | 29         | Male       | Overweight  |
| H         | 21         | Female     | Normal      |
| I         | 34         | Male       | Normal      |
| J         | 28         | Male       | Normal      |
| K         | 28         | Female     | Underweight |
| L         | 37         | Male       | Overweight  |
| M         | 24         | Male       | Normal      |
| N         | 29         | Male       | Normal      |
| O         | 23         | Male       | Overweight  |
| P         | 23         | Female     | Normal      |
| Q         | 25         | Female     | Normal      |
| R         | 36         | Female     | Normal      |
| S         | 25         | Female     | Normal      |
| T         | 28         | Female     | Normal      |

Table S2. Topological features of KEGG orthologous groups across all metagenomes

| <i>GID</i>    | <i>OR-type</i>           | <i>BetweennessCentrality</i> | <i>Centrality Tier</i> |
|---------------|--------------------------|------------------------------|------------------------|
| <i>K14273</i> | high-metabotype-depleted | 0                            | peripheral             |
| <i>K01204</i> | high-metabotype-depleted | 0                            | peripheral             |
| <i>K01505</i> | high-metabotype-depleted | 0                            | peripheral             |
| <i>K09457</i> | high-metabotype-depleted | 0                            | peripheral             |
| <i>K02230</i> | high-metabotype-depleted | 0                            | peripheral             |
| <i>K00929</i> | high-metabotype-depleted | 0                            | peripheral             |
| <i>K03800</i> | high-metabotype-depleted | 0                            | peripheral             |
| <i>K00729</i> | high-metabotype-depleted | 0                            | peripheral             |
| <i>K01259</i> | high-metabotype-depleted | 0                            | peripheral             |
| <i>K02474</i> | high-metabotype-depleted | 0                            | peripheral             |
| <i>K00285</i> | high-metabotype-depleted | 0                            | peripheral             |
| <i>K02749</i> | high-metabotype-depleted | 0                            | peripheral             |
| <i>K03403</i> | high-metabotype-depleted | 0                            | peripheral             |
| <i>K01041</i> | high-metabotype-depleted | 0                            | peripheral             |
| <i>K03367</i> | high-metabotype-depleted | 0                            | peripheral             |
| <i>K01452</i> | high-metabotype-depleted | 0                            | peripheral             |
| <i>K10797</i> | high-metabotype-depleted | 0                            | peripheral             |
| <i>K03927</i> | high-metabotype-depleted | 0                            | peripheral             |
| <i>K01525</i> | high-metabotype-depleted | 0                            | peripheral             |

|               |                          |   |            |
|---------------|--------------------------|---|------------|
| <i>K01661</i> | high-metabotype-depleted | 0 | peripheral |
| <i>K00355</i> | high-metabotype-depleted | 0 | peripheral |
| <i>K00588</i> | high-metabotype-depleted | 0 | peripheral |
| <i>K00097</i> | high-metabotype-depleted | 0 | peripheral |
| <i>K01212</i> | high-metabotype-depleted | 0 | peripheral |
| <i>K14534</i> | high-metabotype-depleted | 0 | peripheral |
| <i>K00073</i> | high-metabotype-depleted | 0 | peripheral |
| <i>K02744</i> | high-metabotype-depleted | 0 | peripheral |
| <i>K06281</i> | high-metabotype-depleted | 0 | peripheral |
| <i>K01820</i> | high-metabotype-depleted | 0 | peripheral |
| <i>K06164</i> | high-metabotype-depleted | 0 | peripheral |
| <i>K01198</i> | high-metabotype-depleted | 0 | peripheral |
| <i>K00791</i> | high-metabotype-depleted | 0 | peripheral |
| <i>K12503</i> | high-metabotype-depleted | 0 | peripheral |
| <i>K01470</i> | high-metabotype-depleted | 0 | peripheral |
| <i>K03429</i> | high-metabotype-depleted | 0 | peripheral |
| <i>K00803</i> | high-metabotype-depleted | 0 | peripheral |
| <i>K01076</i> | high-metabotype-depleted | 0 | peripheral |
| <i>K02750</i> | high-metabotype-depleted | 0 | peripheral |
| <i>K00983</i> | high-metabotype-depleted | 0 | peripheral |
| <i>K01207</i> | high-metabotype-depleted | 0 | peripheral |
| <i>K06606</i> | high-metabotype-depleted | 0 | peripheral |



|               |                          |   |            |
|---------------|--------------------------|---|------------|
| <i>K00950</i> | high-metabotype-depleted | 0 | peripheral |
| <i>K01878</i> | high-metabotype-depleted | 0 | peripheral |
| <i>K03340</i> | high-metabotype-depleted | 0 | peripheral |
| <i>K00067</i> | high-metabotype-depleted | 0 | peripheral |
| <i>K01667</i> | high-metabotype-depleted | 0 | peripheral |
| <i>K09883</i> | high-metabotype-depleted | 0 | peripheral |
| <i>K10012</i> | high-metabotype-depleted | 0 | peripheral |
| <i>K01892</i> | high-metabotype-depleted | 0 | peripheral |
| <i>K02472</i> | high-metabotype-depleted | 0 | peripheral |
| <i>K03795</i> | high-metabotype-depleted | 0 | peripheral |
| <i>K08963</i> | high-metabotype-depleted | 0 | peripheral |
| <i>K01708</i> | high-metabotype-depleted | 0 | peripheral |
| <i>K00483</i> | high-metabotype-depleted | 0 | peripheral |
| <i>K02815</i> | high-metabotype-depleted | 0 | peripheral |
| <i>K02771</i> | high-metabotype-depleted | 0 | peripheral |
| <i>K03274</i> | high-metabotype-depleted | 0 | peripheral |
| <i>K01876</i> | high-metabotype-depleted | 0 | peripheral |
| <i>K00423</i> | high-metabotype-depleted | 0 | peripheral |
| <i>K01867</i> | high-metabotype-depleted | 0 | peripheral |
| <i>K01051</i> | high-metabotype-depleted | 0 | peripheral |
| <i>K01132</i> | high-metabotype-depleted | 0 | peripheral |
| <i>K01209</i> | high-metabotype-depleted | 0 | peripheral |

|               |                          |   |            |
|---------------|--------------------------|---|------------|
| <i>K01887</i> | high-metabotype-depleted | 0 | peripheral |
| <i>K01784</i> | high-metabotype-depleted | 0 | peripheral |
| <i>K01627</i> | high-metabotype-depleted | 0 | peripheral |
| <i>K01880</i> | high-metabotype-depleted | 0 | peripheral |
| <i>K01515</i> | high-metabotype-depleted | 0 | peripheral |
| <i>K05934</i> | high-metabotype-depleted | 0 | peripheral |
| <i>K01042</i> | high-metabotype-depleted | 0 | peripheral |
| <i>K01883</i> | high-metabotype-depleted | 0 | peripheral |
| <i>K10985</i> | high-metabotype-depleted | 0 | peripheral |
| <i>K00257</i> | high-metabotype-depleted | 0 | peripheral |
| <i>K11191</i> | high-metabotype-depleted | 0 | peripheral |
| <i>K11192</i> | high-metabotype-depleted | 0 | peripheral |
| <i>K01890</i> | high-metabotype-depleted | 0 | peripheral |
| <i>K01451</i> | high-metabotype-depleted | 0 | peripheral |
| <i>K01001</i> | high-metabotype-depleted | 0 | peripheral |
| <i>K05780</i> | high-metabotype-depleted | 0 | peripheral |
| <i>K01866</i> | high-metabotype-depleted | 0 | peripheral |
| <i>K01869</i> | high-metabotype-depleted | 0 | peripheral |
| <i>K12554</i> | high-metabotype-depleted | 0 | peripheral |
| <i>K01119</i> | high-metabotype-depleted | 0 | peripheral |
| <i>K02259</i> | high-metabotype-depleted | 0 | peripheral |
| <i>K02190</i> | high-metabotype-depleted | 0 | peripheral |

|               |                          |   |            |
|---------------|--------------------------|---|------------|
| <i>K02377</i> | high-metabotype-depleted | 0 | peripheral |
| <i>K05396</i> | high-metabotype-depleted | 0 | peripheral |
| <i>K01881</i> | high-metabotype-depleted | 0 | peripheral |
| <i>K00881</i> | high-metabotype-depleted | 0 | peripheral |
| <i>K08092</i> | high-metabotype-depleted | 0 | peripheral |
| <i>K01873</i> | high-metabotype-depleted | 0 | peripheral |
| <i>K01761</i> | high-metabotype-depleted | 0 | peripheral |
| <i>K01868</i> | high-metabotype-depleted | 0 | peripheral |
| <i>K01813</i> | high-metabotype-depleted | 0 | peripheral |
| <i>K01779</i> | high-metabotype-depleted | 0 | peripheral |
| <i>K01442</i> | high-metabotype-depleted | 0 | peripheral |
| <i>K00096</i> | high-metabotype-depleted | 0 | peripheral |
| <i>K01870</i> | high-metabotype-depleted | 0 | peripheral |
| <i>K03390</i> | high-metabotype-depleted | 0 | peripheral |
| <i>K07806</i> | high-metabotype-depleted | 0 | peripheral |
| <i>K01889</i> | high-metabotype-depleted | 0 | peripheral |
| <i>K01950</i> | high-metabotype-depleted | 0 | peripheral |
| <i>K03269</i> | high-metabotype-depleted | 0 | peripheral |
| <i>K03404</i> | high-metabotype-depleted | 0 | peripheral |
| <i>K02745</i> | high-metabotype-depleted | 0 | peripheral |
| <i>K09516</i> | high-metabotype-depleted | 0 | peripheral |
| <i>K01906</i> | high-metabotype-depleted | 0 | peripheral |

|               |                          |   |            |
|---------------|--------------------------|---|------------|
| <i>K02169</i> | high-metabotype-depleted | 0 | peripheral |
| <i>K05275</i> | high-metabotype-depleted | 0 | peripheral |
| <i>K04720</i> | high-metabotype-depleted | 0 | peripheral |
| <i>K00019</i> | high-metabotype-depleted | 0 | peripheral |
| <i>K04568</i> | high-metabotype-depleted | 0 | peripheral |
| <i>K01844</i> | high-metabotype-depleted | 0 | peripheral |
| <i>K12308</i> | high-metabotype-depleted | 0 | peripheral |
| <i>K06045</i> | high-metabotype-depleted | 0 | peripheral |
| <i>K00805</i> | high-metabotype-depleted | 0 | peripheral |
| <i>K01684</i> | high-metabotype-depleted | 0 | peripheral |
| <i>K00086</i> | high-metabotype-depleted | 0 | peripheral |
| <i>K00972</i> | high-metabotype-depleted | 0 | peripheral |
| <i>K01879</i> | high-metabotype-depleted | 0 | peripheral |
| <i>K04567</i> | high-metabotype-depleted | 0 | peripheral |
| <i>K09019</i> | high-metabotype-depleted | 0 | peripheral |
| <i>K01201</i> | high-metabotype-depleted | 0 | peripheral |
| <i>K01564</i> | high-metabotype-depleted | 0 | peripheral |
| <i>K00043</i> | high-metabotype-depleted | 0 | peripheral |
| <i>K02809</i> | high-metabotype-depleted | 0 | peripheral |
| <i>K02810</i> | high-metabotype-depleted | 0 | peripheral |
| <i>K05297</i> | high-metabotype-depleted | 0 | peripheral |
| <i>K14338</i> | high-metabotype-depleted | 0 | peripheral |

|               |                          |   |            |
|---------------|--------------------------|---|------------|
| <i>K01872</i> | high-metabotype-depleted | 0 | peripheral |
| <i>K03366</i> | high-metabotype-depleted | 0 | peripheral |
| <i>K02567</i> | high-metabotype-depleted | 0 | peripheral |
| <i>K00090</i> | high-metabotype-depleted | 0 | peripheral |
| <i>K09759</i> | high-metabotype-depleted | 0 | peripheral |
| <i>K13921</i> | high-metabotype-depleted | 0 | peripheral |
| <i>K02763</i> | high-metabotype-depleted | 0 | peripheral |
| <i>K01112</i> | high-metabotype-depleted | 0 | peripheral |
| <i>K05305</i> | high-metabotype-depleted | 0 | peripheral |
| <i>K04566</i> | high-metabotype-depleted | 0 | peripheral |
| <i>K02610</i> | high-metabotype-depleted | 0 | peripheral |
| <i>K00082</i> | high-metabotype-depleted | 0 | peripheral |
| <i>K08678</i> | high-metabotype-depleted | 0 | peripheral |
| <i>K01101</i> | high-metabotype-depleted | 0 | peripheral |
| <i>K12527</i> | high-metabotype-depleted | 0 | peripheral |
| <i>K00980</i> | high-metabotype-depleted | 0 | peripheral |
| <i>K02764</i> | high-metabotype-depleted | 0 | peripheral |
| <i>K02765</i> | high-metabotype-depleted | 0 | peripheral |
| <i>K06151</i> | high-metabotype-depleted | 0 | peripheral |
| <i>K06152</i> | high-metabotype-depleted | 0 | peripheral |
| <i>K01590</i> | high-metabotype-depleted | 0 | peripheral |
| <i>K03392</i> | high-metabotype-depleted | 0 | peripheral |

|               |                          |   |            |
|---------------|--------------------------|---|------------|
| <i>K08679</i> | high-metabotype-depleted | 0 | peripheral |
| <i>K06282</i> | high-metabotype-depleted | 0 | peripheral |
| <i>K03388</i> | high-metabotype-depleted | 0 | peripheral |
| <i>K00020</i> | high-metabotype-depleted | 0 | peripheral |
| <i>K08261</i> | high-metabotype-depleted | 0 | peripheral |
| <i>K04022</i> | high-metabotype-depleted | 0 | peripheral |
| <i>K13043</i> | high-metabotype-depleted | 0 | peripheral |
| <i>K03862</i> | high-metabotype-depleted | 0 | peripheral |
| <i>K04091</i> | high-metabotype-depleted | 0 | peripheral |
| <i>K03635</i> | high-metabotype-depleted | 0 | peripheral |
| <i>K14164</i> | Other                    | 0 | peripheral |
| <i>K06166</i> | Other                    | 0 | peripheral |
| <i>K14188</i> | Other                    | 0 | peripheral |
| <i>K06879</i> | Other                    | 0 | peripheral |
| <i>K01199</i> | Other                    | 0 | peripheral |
| <i>K00836</i> | Other                    | 0 | peripheral |
| <i>K00462</i> | Other                    | 0 | peripheral |
| <i>K11196</i> | Other                    | 0 | peripheral |
| <i>K01916</i> | Other                    | 0 | peripheral |
| <i>K05712</i> | Other                    | 0 | peripheral |
| <i>K03332</i> | Other                    | 0 | peripheral |
| <i>K08358</i> | Other                    | 0 | peripheral |
| <i>K13019</i> | Other                    | 0 | peripheral |
| <i>K09461</i> | Other                    | 0 | peripheral |
| <i>K12528</i> | Other                    | 0 | peripheral |
| <i>K03389</i> | Other                    | 0 | peripheral |
| <i>K13566</i> | Other                    | 0 | peripheral |
| <i>K14465</i> | Other                    | 0 | peripheral |
| <i>K02746</i> | Other                    | 0 | peripheral |
| <i>K12452</i> | Other                    | 0 | peripheral |
| <i>K05601</i> | Other                    | 0 | peripheral |
| <i>K10986</i> | Other                    | 0 | peripheral |

|               |                            |   |            |
|---------------|----------------------------|---|------------|
| <i>K08969</i> | Other                      | 0 | peripheral |
| <i>K01210</i> | Other                      | 0 | peripheral |
| <i>K02747</i> | Other                      | 0 | peripheral |
| <i>K02813</i> | Other                      | 0 | peripheral |
| <i>K11646</i> | Other                      | 0 | peripheral |
| <i>K05395</i> | Other                      | 0 | peripheral |
| <i>K09882</i> | Other                      | 0 | peripheral |
| <i>K01574</i> | Other                      | 0 | peripheral |
| <i>K07310</i> | Other                      | 0 | peripheral |
| <i>K03405</i> | Other                      | 0 | peripheral |
| <i>K00119</i> | Other                      | 0 | peripheral |
| <i>K12529</i> | Other                      | 0 | peripheral |
| <i>K11214</i> | Other                      | 0 | peripheral |
| <i>K10984</i> | Other                      | 0 | peripheral |
| <i>K00373</i> | Other                      | 0 | peripheral |
| <i>K02808</i> | Other                      | 0 | peripheral |
| <i>K08357</i> | Other                      | 0 | peripheral |
| <i>K00370</i> | Other                      | 0 | peripheral |
| <i>K00371</i> | Other                      | 0 | peripheral |
| <i>K01718</i> | Other                      | 0 | peripheral |
| <i>K01044</i> | Other                      | 0 | peripheral |
| <i>K00130</i> | Other                      | 0 | peripheral |
| <i>K00934</i> | Other                      | 0 | peripheral |
| <i>K03863</i> | Other                      | 0 | peripheral |
| <i>K07309</i> | high-metabotype-associated | 0 | peripheral |
| <i>K02814</i> | high-metabotype-associated | 0 | peripheral |
| <i>K12661</i> | high-metabotype-associated | 0 | peripheral |
| <i>K08312</i> | high-metabotype-associated | 0 | peripheral |
| <i>K13774</i> | high-metabotype-associated | 0 | peripheral |
| <i>K02752</i> | high-metabotype-associated | 0 | peripheral |
| <i>K02753</i> | high-metabotype-associated | 0 | peripheral |
| <i>K06193</i> | high-metabotype-associated | 0 | peripheral |
| <i>K08351</i> | high-metabotype-associated | 0 | peripheral |

|               |                            |   |            |
|---------------|----------------------------|---|------------|
| <i>K04032</i> | high-metabotype-associated | 0 | peripheral |
| <i>K04480</i> | high-metabotype-associated | 0 | peripheral |
| <i>K00523</i> | high-metabotype-associated | 0 | peripheral |
| <i>K04103</i> | high-metabotype-associated | 0 | peripheral |
| <i>K00374</i> | high-metabotype-associated | 0 | peripheral |
| <i>K00372</i> | high-metabotype-associated | 0 | peripheral |
| <i>K06165</i> | high-metabotype-associated | 0 | peripheral |
| <i>K09835</i> | high-metabotype-associated | 0 | peripheral |
| <i>K05352</i> | high-metabotype-associated | 0 | peripheral |
| <i>K08096</i> | high-metabotype-associated | 0 | peripheral |
| <i>K00066</i> | high-metabotype-associated | 0 | peripheral |
| <i>K14080</i> | high-metabotype-associated | 0 | peripheral |
| <i>K14081</i> | high-metabotype-associated | 0 | peripheral |
| <i>K04835</i> | high-metabotype-associated | 0 | peripheral |
| <i>K00114</i> | high-metabotype-associated | 0 | peripheral |
| <i>K01725</i> | high-metabotype-associated | 0 | peripheral |
| <i>K01705</i> | high-metabotype-associated | 0 | peripheral |
| <i>K03636</i> | high-metabotype-associated | 0 | peripheral |
| <i>K03895</i> | high-metabotype-enriched   | 0 | peripheral |
| <i>K00484</i> | high-metabotype-enriched   | 0 | peripheral |
| <i>K05973</i> | high-metabotype-enriched   | 0 | peripheral |
| <i>K00004</i> | Other                      | 0 | peripheral |
| <i>K00315</i> | Other                      | 0 | peripheral |



|               |       |          |            |
|---------------|-------|----------|------------|
| <i>K00360</i> | Other | 0        | peripheral |
| <i>K00485</i> | Other | 0        | peripheral |
| <i>K00493</i> | Other | 0        | peripheral |
| <i>K00587</i> | Other | 0        | peripheral |
| <i>K00591</i> | Other | 0        | peripheral |
| <i>K00635</i> | Other | 0        | peripheral |
| <i>K00816</i> | Other | 0        | peripheral |
| <i>K00875</i> | Other | 0        | peripheral |
| <i>K00887</i> | Other | 0        | peripheral |
| <i>K00922</i> | Other | 0        | peripheral |
| <i>K01049</i> | Other | 0        | peripheral |
| <i>K01237</i> | Other | 0        | peripheral |
| <i>K01253</i> | Other | 0        | peripheral |
| <i>K01522</i> | Other | 0        | peripheral |
| <i>K02568</i> | Other | 0        | peripheral |
| <i>K02609</i> | Other | 0        | peripheral |
| <i>K02611</i> | Other | 0        | peripheral |
| <i>K02612</i> | Other | 0        | peripheral |
| <i>K02613</i> | Other | 0        | peripheral |
| <i>K03391</i> | Other | 0        | peripheral |
| <i>K03857</i> | Other | 0        | peripheral |
| <i>K04097</i> | Other | 0        | peripheral |
| <i>K04099</i> | Other | 0        | peripheral |
| <i>K06118</i> | Other | 0        | peripheral |
| <i>K06611</i> | Other | 0        | peripheral |
| <i>K07249</i> | Other | 0        | peripheral |
| <i>K07534</i> | Other | 0        | peripheral |
| <i>K07548</i> | Other | 0        | peripheral |
| <i>K10105</i> | Other | 0        | peripheral |
| <i>K11211</i> | Other | 0        | peripheral |
| <i>K11422</i> | Other | 0        | peripheral |
| <i>K11778</i> | Other | 0        | peripheral |
| <i>K12420</i> | Other | 0        | peripheral |
| <i>K12504</i> | Other | 0        | peripheral |
| <i>K13028</i> | Other | 0        | peripheral |
| <i>K13995</i> | Other | 0        | peripheral |
| <i>K14268</i> | Other | 0        | peripheral |
| <i>K14447</i> | Other | 0        | peripheral |
| <i>K14449</i> | Other | 0        | peripheral |
| <i>K08683</i> | Other | 4.00E-08 | peripheral |

|               |                            |          |            |
|---------------|----------------------------|----------|------------|
| <i>K11147</i> | high-metabotype-depleted   | 5.00E-08 | peripheral |
| <i>K11150</i> | high-metabotype-depleted   | 5.00E-08 | peripheral |
| <i>K11153</i> | high-metabotype-depleted   | 5.00E-08 | peripheral |
| <i>K11152</i> | Other                      | 5.00E-08 | peripheral |
| <i>K01746</i> | high-metabotype-depleted   | 9.00E-08 | peripheral |
| <i>K03330</i> | Other                      | 9.00E-08 | peripheral |
| <i>K09482</i> | high-metabotype-associated | 9.00E-08 | peripheral |
| <i>K00147</i> | high-metabotype-depleted   | 1.40E-07 | peripheral |
| <i>K02799</i> | high-metabotype-depleted   | 1.70E-07 | peripheral |
| <i>K02800</i> | high-metabotype-depleted   | 1.70E-07 | peripheral |
| <i>K02798</i> | high-metabotype-depleted   | 1.70E-07 | peripheral |
| <i>K01488</i> | high-metabotype-depleted   | 1.80E-07 | peripheral |
| <i>K01702</i> | Other                      | 1.80E-07 | peripheral |
| <i>K14267</i> | high-metabotype-depleted   | 2.30E-07 | peripheral |
| <i>K13479</i> | high-metabotype-depleted   | 2.80E-07 | peripheral |
| <i>K13481</i> | high-metabotype-depleted   | 2.80E-07 | peripheral |
| <i>K03786</i> | high-metabotype-depleted   | 2.80E-07 | peripheral |
| <i>K00087</i> | high-metabotype-depleted   | 2.80E-07 | peripheral |
| <i>K03785</i> | high-metabotype-depleted   | 2.80E-07 | peripheral |
| <i>K13480</i> | Other                      | 2.80E-07 | peripheral |
| <i>K13483</i> | Other                      | 2.80E-07 | peripheral |
| <i>K11178</i> | high-metabotype-associated | 2.80E-07 | peripheral |
| <i>K11177</i> | high-metabotype-associated | 2.80E-07 | peripheral |
| <i>K13482</i> | high-metabotype-enriched   | 2.80E-07 | peripheral |

|               |                            |          |            |
|---------------|----------------------------|----------|------------|
| <i>K00919</i> | high-metabotype-depleted   | 3.50E-07 | peripheral |
| <i>K00014</i> | high-metabotype-depleted   | 3.50E-07 | peripheral |
| <i>K01716</i> | high-metabotype-depleted   | 3.50E-07 | peripheral |
| <i>K00841</i> | high-metabotype-depleted   | 3.50E-07 | peripheral |
| <i>K08281</i> | high-metabotype-depleted   | 4.00E-07 | peripheral |
| <i>K00985</i> | high-metabotype-depleted   | 4.30E-07 | peripheral |
| <i>K01720</i> | Other                      | 4.40E-07 | peripheral |
| <i>K00932</i> | Other                      | 4.60E-07 | peripheral |
| <i>K00442</i> | Other                      | 4.60E-07 | peripheral |
| <i>K00441</i> | Other                      | 4.60E-07 | peripheral |
| <i>K00443</i> | Other                      | 4.60E-07 | peripheral |
| <i>K00440</i> | high-metabotype-enriched   | 4.60E-07 | peripheral |
| <i>K06127</i> | high-metabotype-depleted   | 4.70E-07 | peripheral |
| <i>K00891</i> | high-metabotype-depleted   | 4.70E-07 | peripheral |
| <i>K00878</i> | high-metabotype-depleted   | 6.10E-07 | peripheral |
| <i>K00703</i> | high-metabotype-depleted   | 7.00E-07 | peripheral |
| <i>K01952</i> | high-metabotype-depleted   | 7.00E-07 | peripheral |
| <i>K01937</i> | high-metabotype-depleted   | 7.70E-07 | peripheral |
| <i>K01934</i> | high-metabotype-depleted   | 8.40E-07 | peripheral |
| <i>K04561</i> | high-metabotype-associated | 1.03E-06 | peripheral |
| <i>K03421</i> | high-metabotype-associated | 1.05E-06 | peripheral |
| <i>K00400</i> | high-metabotype-associated | 1.05E-06 | peripheral |
| <i>K00399</i> | high-metabotype-associated | 1.05E-06 | peripheral |
| <i>K03422</i> | high-metabotype-associated | 1.05E-06 | peripheral |

|               |                            |          |            |
|---------------|----------------------------|----------|------------|
| <i>K00401</i> | high-metabotype-enriched   | 1.05E-06 | peripheral |
| <i>K00402</i> | high-metabotype-enriched   | 1.05E-06 | peripheral |
| <i>K05887</i> | high-metabotype-depleted   | 1.10E-06 | peripheral |
| <i>K01179</i> | high-metabotype-depleted   | 1.33E-06 | peripheral |
| <i>K01225</i> | high-metabotype-depleted   | 1.33E-06 | peripheral |
| <i>K00060</i> | Other                      | 1.41E-06 | peripheral |
| <i>K01951</i> | high-metabotype-depleted   | 1.63E-06 | peripheral |
| <i>K05708</i> | high-metabotype-associated | 1.71E-06 | peripheral |
| <i>K05709</i> | Other                      | 1.71E-06 | peripheral |
| <i>K00133</i> | high-metabotype-depleted   | 1.83E-06 | peripheral |
| <i>K03781</i> | high-metabotype-depleted   | 1.86E-06 | peripheral |
| <i>K01496</i> | high-metabotype-depleted   | 1.87E-06 | peripheral |
| <i>K05979</i> | high-metabotype-depleted   | 1.97E-06 | peripheral |
| <i>K01941</i> | Other                      | 2.00E-06 | peripheral |
| <i>K07405</i> | high-metabotype-depleted   | 2.06E-06 | peripheral |
| <i>K01176</i> | high-metabotype-depleted   | 2.06E-06 | peripheral |
| <i>K01069</i> | high-metabotype-depleted   | 2.37E-06 | peripheral |
| <i>K01588</i> | high-metabotype-depleted   | 2.47E-06 | peripheral |
| <i>K01499</i> | Other                      | 2.50E-06 | peripheral |
| <i>K03779</i> | high-metabotype-depleted   | 2.66E-06 | peripheral |
| <i>K03780</i> | Other                      | 2.66E-06 | peripheral |
| <i>K00059</i> | high-metabotype-depleted   | 3.52E-06 | peripheral |
| <i>K02189</i> | high-metabotype-depleted   | 3.52E-06 | peripheral |
| <i>K02191</i> | high-metabotype-depleted   | 3.52E-06 | peripheral |

|               |                            |          |            |
|---------------|----------------------------|----------|------------|
| <i>K01933</i> | high-metabotype-depleted   | 3.72E-06 | peripheral |
| <i>K06863</i> | high-metabotype-associated | 3.87E-06 | peripheral |
| <i>K00882</i> | high-metabotype-depleted   | 3.88E-06 | peripheral |
| <i>K08692</i> | Other                      | 3.89E-06 | peripheral |
| <i>K14067</i> | Other                      | 3.89E-06 | peripheral |
| <i>K00145</i> | high-metabotype-depleted   | 4.48E-06 | peripheral |
| <i>K00053</i> | high-metabotype-depleted   | 4.61E-06 | peripheral |
| <i>K00700</i> | high-metabotype-depleted   | 5.79E-06 | peripheral |
| <i>K01465</i> | high-metabotype-depleted   | 5.88E-06 | peripheral |
| <i>K05607</i> | Other                      | 6.37E-06 | peripheral |
| <i>K13766</i> | Other                      | 6.37E-06 | peripheral |
| <i>K12235</i> | Other                      | 7.24E-06 | peripheral |
| <i>K01816</i> | high-metabotype-depleted   | 7.60E-06 | peripheral |
| <i>K00954</i> | high-metabotype-depleted   | 7.69E-06 | peripheral |
| <i>K02201</i> | high-metabotype-associated | 7.69E-06 | peripheral |
| <i>K01576</i> | high-metabotype-associated | 7.89E-06 | peripheral |
| <i>K00645</i> | high-metabotype-depleted   | 8.85E-06 | peripheral |
| <i>K13935</i> | high-metabotype-enriched   | 8.85E-06 | peripheral |
| <i>K00290</i> | high-metabotype-depleted   | 8.99E-06 | peripheral |
| <i>K09789</i> | high-metabotype-depleted   | 9.79E-06 | peripheral |
| <i>K02170</i> | high-metabotype-associated | 9.79E-06 | peripheral |
| <i>K10536</i> | high-metabotype-depleted   | 9.89E-06 | peripheral |
| <i>K04486</i> | high-metabotype-depleted   | 9.96E-06 | peripheral |
| <i>K06446</i> | high-metabotype-associated | 1.03E-05 | peripheral |

|               |                            |          |            |
|---------------|----------------------------|----------|------------|
| <i>K01703</i> | high-metabotype-depleted   | 1.03E-05 | peripheral |
| <i>K01704</i> | high-metabotype-depleted   | 1.03E-05 | peripheral |
| <i>K01826</i> | Other                      | 1.06E-05 | peripheral |
| <i>K00500</i> | high-metabotype-depleted   | 1.10E-05 | peripheral |
| <i>K00941</i> | high-metabotype-depleted   | 1.14E-05 | peripheral |
| <i>K00877</i> | Other                      | 1.14E-05 | peripheral |
| <i>K01945</i> | high-metabotype-depleted   | 1.31E-05 | peripheral |
| <i>K01935</i> | high-metabotype-depleted   | 1.36E-05 | peripheral |
| <i>K01487</i> | high-metabotype-depleted   | 1.45E-05 | peripheral |
| <i>K13923</i> | high-metabotype-depleted   | 1.50E-05 | peripheral |
| <i>K00852</i> | high-metabotype-depleted   | 1.55E-05 | peripheral |
| <i>K07251</i> | high-metabotype-depleted   | 1.56E-05 | peripheral |
| <i>K02340</i> | high-metabotype-depleted   | 1.57E-05 | peripheral |
| <i>K02342</i> | high-metabotype-depleted   | 1.57E-05 | peripheral |
| <i>K02341</i> | high-metabotype-depleted   | 1.57E-05 | peripheral |
| <i>K02337</i> | high-metabotype-depleted   | 1.57E-05 | peripheral |
| <i>K02335</i> | high-metabotype-depleted   | 1.57E-05 | peripheral |
| <i>K02338</i> | high-metabotype-depleted   | 1.57E-05 | peripheral |
| <i>K02343</i> | high-metabotype-depleted   | 1.57E-05 | peripheral |
| <i>K03763</i> | high-metabotype-depleted   | 1.57E-05 | peripheral |
| <i>K02345</i> | Other                      | 1.57E-05 | peripheral |
| <i>K02344</i> | Other                      | 1.57E-05 | peripheral |
| <i>K02319</i> | high-metabotype-associated | 1.57E-05 | peripheral |

|               |                            |          |            |
|---------------|----------------------------|----------|------------|
| <i>K02339</i> | high-metabotype-associated | 1.57E-05 | peripheral |
| <i>K02323</i> | high-metabotype-associated | 1.57E-05 | peripheral |
| <i>K02322</i> | high-metabotype-associated | 1.57E-05 | peripheral |
| <i>K14159</i> | high-metabotype-enriched   | 1.57E-05 | peripheral |
| <i>K02324</i> | Other                      | 1.57E-05 | peripheral |
| <i>K02327</i> | Other                      | 1.57E-05 | peripheral |
| <i>K01071</i> | high-metabotype-depleted   | 1.62E-05 | peripheral |
| <i>K00835</i> | Other                      | 1.65E-05 | peripheral |
| <i>K00872</i> | high-metabotype-depleted   | 1.68E-05 | peripheral |
| <i>K02204</i> | high-metabotype-depleted   | 1.68E-05 | peripheral |
| <i>K01486</i> | high-metabotype-depleted   | 1.70E-05 | peripheral |
| <i>K00287</i> | high-metabotype-depleted   | 1.75E-05 | peripheral |
| <i>K13938</i> | Other                      | 1.75E-05 | peripheral |
| <i>K00689</i> | high-metabotype-depleted   | 1.80E-05 | peripheral |
| <i>K05341</i> | high-metabotype-depleted   | 1.80E-05 | peripheral |
| <i>K03185</i> | Other                      | 1.85E-05 | peripheral |
| <i>K10805</i> | high-metabotype-depleted   | 1.90E-05 | peripheral |
| <i>K10806</i> | high-metabotype-depleted   | 1.90E-05 | peripheral |
| <i>K10804</i> | high-metabotype-depleted   | 1.90E-05 | peripheral |
| <i>K01874</i> | high-metabotype-depleted   | 2.20E-05 | peripheral |
| <i>K03562</i> | high-metabotype-depleted   | 2.34E-05 | peripheral |
| <i>K01220</i> | Other                      | 2.35E-05 | peripheral |
| <i>K07516</i> | high-metabotype-depleted   | 2.40E-05 | peripheral |
| <i>K07256</i> | Other                      | 2.42E-05 | peripheral |
| <i>K06120</i> | high-metabotype-depleted   | 2.47E-05 | peripheral |

|               |                            |          |            |
|---------------|----------------------------|----------|------------|
| <i>K06122</i> | high-metabotype-depleted   | 2.47E-05 | peripheral |
| <i>K06121</i> | Other                      | 2.47E-05 | peripheral |
| <i>K01509</i> | Other                      | 2.50E-05 | peripheral |
| <i>K00074</i> | high-metabotype-depleted   | 2.56E-05 | peripheral |
| <i>K12255</i> | Other                      | 2.57E-05 | peripheral |
| <i>K00216</i> | high-metabotype-depleted   | 2.61E-05 | peripheral |
| <i>K00297</i> | high-metabotype-depleted   | 2.65E-05 | peripheral |
| <i>K01712</i> | high-metabotype-depleted   | 2.67E-05 | peripheral |
| <i>K00904</i> | Other                      | 2.83E-05 | peripheral |
| <i>K01707</i> | Other                      | 2.91E-05 | peripheral |
| <i>K02371</i> | high-metabotype-depleted   | 2.97E-05 | peripheral |
| <i>K10780</i> | high-metabotype-associated | 2.97E-05 | peripheral |
| <i>K01893</i> | high-metabotype-depleted   | 3.06E-05 | peripheral |
| <i>K01560</i> | high-metabotype-depleted   | 3.09E-05 | peripheral |
| <i>K01561</i> | high-metabotype-depleted   | 3.09E-05 | peripheral |
| <i>K00800</i> | high-metabotype-depleted   | 3.25E-05 | peripheral |
| <i>K01057</i> | high-metabotype-depleted   | 3.26E-05 | peripheral |
| <i>K07404</i> | high-metabotype-depleted   | 3.26E-05 | peripheral |
| <i>K02819</i> | high-metabotype-depleted   | 3.30E-05 | peripheral |
| <i>K02818</i> | high-metabotype-depleted   | 3.30E-05 | peripheral |
| <i>K02817</i> | Other                      | 3.30E-05 | peripheral |
| <i>K00895</i> | high-metabotype-depleted   | 3.39E-05 | peripheral |
| <i>K00819</i> | high-metabotype-depleted   | 3.41E-05 | peripheral |
| <i>K00647</i> | high-metabotype-depleted   | 3.54E-05 | peripheral |



|               |                            |          |            |
|---------------|----------------------------|----------|------------|
| <i>K09458</i> | high-metabotype-depleted   | 3.54E-05 | peripheral |
| <i>K02303</i> | high-metabotype-depleted   | 3.59E-05 | peripheral |
| <i>K02496</i> | Other                      | 3.59E-05 | peripheral |
| <i>K01792</i> | high-metabotype-depleted   | 3.71E-05 | peripheral |
| <i>K01770</i> | high-metabotype-depleted   | 3.85E-05 | peripheral |
| <i>K11176</i> | Other                      | 3.85E-05 | peripheral |
| <i>K01502</i> | high-metabotype-depleted   | 3.85E-05 | peripheral |
| <i>K00224</i> | Other                      | 3.92E-05 | peripheral |
| <i>K01908</i> | high-metabotype-associated | 4.15E-05 | peripheral |
| <i>K03336</i> | high-metabotype-depleted   | 4.17E-05 | peripheral |
| <i>K02803</i> | Other                      | 4.17E-05 | peripheral |
| <i>K02804</i> | Other                      | 4.17E-05 | peripheral |
| <i>K02802</i> | high-metabotype-associated | 4.17E-05 | peripheral |
| <i>K14379</i> | high-metabotype-depleted   | 4.18E-05 | peripheral |
| <i>K03841</i> | high-metabotype-depleted   | 4.20E-05 | peripheral |
| <i>K04041</i> | high-metabotype-depleted   | 4.20E-05 | peripheral |
| <i>K02446</i> | high-metabotype-depleted   | 4.20E-05 | peripheral |
| <i>K00137</i> | high-metabotype-associated | 4.21E-05 | peripheral |
| <i>K00833</i> | high-metabotype-depleted   | 4.24E-05 | peripheral |
| <i>K00927</i> | high-metabotype-depleted   | 4.25E-05 | peripheral |
| <i>K00885</i> | Other                      | 4.57E-05 | peripheral |
| <i>K01838</i> | high-metabotype-depleted   | 4.62E-05 | peripheral |
| <i>K00863</i> | high-metabotype-depleted   | 4.63E-05 | peripheral |
| <i>K05878</i> | high-metabotype-depleted   | 4.63E-05 | peripheral |

|               |                            |          |            |
|---------------|----------------------------|----------|------------|
| <i>K05879</i> | high-metabotype-depleted   | 4.63E-05 | peripheral |
| <i>K01611</i> | high-metabotype-depleted   | 4.85E-05 | peripheral |
| <i>K01856</i> | Other                      | 5.26E-05 | peripheral |
| <i>K05342</i> | Other                      | 5.32E-05 | peripheral |
| <i>K01424</i> | high-metabotype-depleted   | 5.34E-05 | peripheral |
| <i>K01953</i> | high-metabotype-depleted   | 5.34E-05 | peripheral |
| <i>K01914</i> | high-metabotype-depleted   | 5.34E-05 | peripheral |
| <i>K12658</i> | high-metabotype-depleted   | 5.46E-05 | peripheral |
| <i>K01907</i> | high-metabotype-enriched   | 5.50E-05 | peripheral |
| <i>K01968</i> | Other                      | 5.72E-05 | peripheral |
| <i>K01969</i> | high-metabotype-associated | 5.72E-05 | peripheral |
| <i>K00134</i> | high-metabotype-depleted   | 5.77E-05 | peripheral |
| <i>K00150</i> | Other                      | 5.77E-05 | peripheral |
| <i>K05298</i> | high-metabotype-enriched   | 5.77E-05 | peripheral |
| <i>K10705</i> | Other                      | 5.77E-05 | peripheral |
| <i>K00558</i> | high-metabotype-depleted   | 5.78E-05 | peripheral |
| <i>K01095</i> | high-metabotype-depleted   | 5.80E-05 | peripheral |
| <i>K01096</i> | Other                      | 5.80E-05 | peripheral |
| <i>K08352</i> | high-metabotype-depleted   | 5.83E-05 | peripheral |
| <i>K08354</i> | high-metabotype-depleted   | 5.83E-05 | peripheral |
| <i>K08353</i> | Other                      | 5.83E-05 | peripheral |
| <i>K01241</i> | high-metabotype-depleted   | 5.98E-05 | peripheral |
| <i>K03417</i> | high-metabotype-depleted   | 6.06E-05 | peripheral |
| <i>K01008</i> | high-metabotype-depleted   | 6.20E-05 | peripheral |
| <i>K09471</i> | Other                      | 6.29E-05 | peripheral |

|               |                            |          |            |
|---------------|----------------------------|----------|------------|
| <i>K02775</i> | high-metabotype-depleted   | 6.51E-05 | peripheral |
| <i>K02774</i> | high-metabotype-depleted   | 6.51E-05 | peripheral |
| <i>K02773</i> | high-metabotype-depleted   | 6.51E-05 | peripheral |
| <i>K00253</i> | high-metabotype-depleted   | 6.52E-05 | peripheral |
| <i>K01817</i> | high-metabotype-depleted   | 6.53E-05 | peripheral |
| <i>K00042</i> | high-metabotype-depleted   | 6.53E-05 | peripheral |
| <i>K00691</i> | high-metabotype-depleted   | 6.64E-05 | peripheral |
| <i>K02439</i> | high-metabotype-depleted   | 6.72E-05 | peripheral |
| <i>K07246</i> | high-metabotype-associated | 6.82E-05 | peripheral |
| <i>K03475</i> | high-metabotype-depleted   | 6.95E-05 | peripheral |
| <i>K02821</i> | high-metabotype-depleted   | 6.95E-05 | peripheral |
| <i>K02822</i> | Other                      | 6.95E-05 | peripheral |
| <i>K02594</i> | high-metabotype-depleted   | 7.12E-05 | peripheral |
| <i>K05351</i> | high-metabotype-depleted   | 7.15E-05 | peripheral |
| <i>K01857</i> | Other                      | 7.18E-05 | peripheral |
| <i>K02793</i> | high-metabotype-depleted   | 7.21E-05 | peripheral |
| <i>K02795</i> | high-metabotype-depleted   | 7.21E-05 | peripheral |
| <i>K02794</i> | high-metabotype-depleted   | 7.21E-05 | peripheral |
| <i>K02796</i> | high-metabotype-depleted   | 7.21E-05 | peripheral |
| <i>K00094</i> | high-metabotype-depleted   | 7.27E-05 | peripheral |
| <i>K00693</i> | high-metabotype-depleted   | 7.48E-05 | peripheral |
| <i>K01608</i> | Other                      | 7.53E-05 | peripheral |
| <i>K05825</i> | Other                      | 7.58E-05 | peripheral |

|               |                            |          |            |
|---------------|----------------------------|----------|------------|
| <i>K01800</i> | high-metabotype-depleted   | 7.70E-05 | peripheral |
| <i>K01520</i> | high-metabotype-depleted   | 7.82E-05 | peripheral |
| <i>K00957</i> | high-metabotype-depleted   | 8.08E-05 | peripheral |
| <i>K00956</i> | high-metabotype-depleted   | 8.08E-05 | peripheral |
| <i>K00958</i> | high-metabotype-enriched   | 8.08E-05 | peripheral |
| <i>K04098</i> | Other                      | 8.09E-05 | peripheral |
| <i>K09722</i> | high-metabotype-enriched   | 8.23E-05 | peripheral |
| <i>K01715</i> | high-metabotype-depleted   | 8.26E-05 | peripheral |
| <i>K01598</i> | high-metabotype-depleted   | 8.40E-05 | peripheral |
| <i>K01615</i> | high-metabotype-depleted   | 8.52E-05 | peripheral |
| <i>K00641</i> | high-metabotype-depleted   | 8.57E-05 | peripheral |
| <i>K03707</i> | high-metabotype-depleted   | 8.90E-05 | peripheral |
| <i>K00467</i> | Other                      | 9.01E-05 | peripheral |
| <i>K11263</i> | high-metabotype-depleted   | 9.06E-05 | peripheral |
| <i>K01523</i> | high-metabotype-depleted   | 9.17E-05 | peripheral |
| <i>K06034</i> | high-metabotype-associated | 9.19E-05 | peripheral |
| <i>K13039</i> | high-metabotype-enriched   | 9.19E-05 | peripheral |
| <i>K00460</i> | Other                      | 9.26E-05 | peripheral |
| <i>K11264</i> | high-metabotype-depleted   | 9.27E-05 | peripheral |
| <i>K10817</i> | Other                      | 9.27E-05 | peripheral |
| <i>K01609</i> | high-metabotype-depleted   | 9.47E-05 | peripheral |
| <i>K00451</i> | high-metabotype-enriched   | 9.49E-05 | peripheral |
| <i>K00639</i> | high-metabotype-depleted   | 9.53E-05 | peripheral |

|               |                            |            |            |
|---------------|----------------------------|------------|------------|
| <i>K04516</i> | high-metabotype-depleted   | 9.57E-05   | peripheral |
| <i>K01850</i> | high-metabotype-depleted   | 9.57E-05   | peripheral |
| <i>K06209</i> | high-metabotype-depleted   | 9.57E-05   | peripheral |
| <i>K04092</i> | Other                      | 9.57E-05   | peripheral |
| <i>K04093</i> | Other                      | 9.57E-05   | peripheral |
| <i>K06208</i> | high-metabotype-associated | 9.57E-05   | peripheral |
| <i>K00088</i> | high-metabotype-depleted   | 9.65E-05   | peripheral |
| <i>K06982</i> | Other                      | 9.70E-05   | peripheral |
| <i>K01821</i> | Other                      | 9.73E-05   | peripheral |
| <i>K00651</i> | high-metabotype-depleted   | 9.81E-05   | peripheral |
| <i>K00938</i> | Other                      | 0.00010267 | peripheral |
| <i>K01785</i> | high-metabotype-depleted   | 0.00010448 | peripheral |
| <i>K03473</i> | high-metabotype-depleted   | 0.00011018 | peripheral |
| <i>K10206</i> | high-metabotype-depleted   | 0.00011088 | peripheral |
| <i>K01591</i> | high-metabotype-depleted   | 0.0001112  | peripheral |
| <i>K00241</i> | high-metabotype-depleted   | 0.00011409 | peripheral |
| <i>K00240</i> | high-metabotype-depleted   | 0.00011409 | peripheral |
| <i>K00246</i> | high-metabotype-depleted   | 0.00011409 | peripheral |
| <i>K00235</i> | high-metabotype-depleted   | 0.00011409 | peripheral |
| <i>K00245</i> | high-metabotype-depleted   | 0.00011409 | peripheral |
| <i>K00239</i> | high-metabotype-depleted   | 0.00011409 | peripheral |
| <i>K00244</i> | high-metabotype-depleted   | 0.00011409 | peripheral |
| <i>K00247</i> | Other                      | 0.00011409 | peripheral |
| <i>K00242</i> | Other                      | 0.00011409 | peripheral |
| <i>K00234</i> | Other                      | 0.00011409 | peripheral |

|               |                          |            |            |
|---------------|--------------------------|------------|------------|
| <i>K01834</i> | high-metabotype-depleted | 0.00011417 | peripheral |
| <i>K00943</i> | high-metabotype-depleted | 0.00011544 | peripheral |
| <i>K03426</i> | high-metabotype-depleted | 0.00011656 | peripheral |
| <i>K01464</i> | high-metabotype-depleted | 0.00011881 | peripheral |
| <i>K01457</i> | high-metabotype-depleted | 0.00012255 | peripheral |
| <i>K01473</i> | high-metabotype-depleted | 0.00012279 | peripheral |
| <i>K01474</i> | high-metabotype-depleted | 0.00012279 | peripheral |
| <i>K01847</i> | high-metabotype-depleted | 0.00012531 | peripheral |
| <i>K01848</i> | high-metabotype-depleted | 0.00012531 | peripheral |
| <i>K01849</i> | Other                    | 0.00012531 | peripheral |
| <i>K01687</i> | high-metabotype-depleted | 0.00012546 | peripheral |
| <i>K00453</i> | high-metabotype-depleted | 0.00012871 | peripheral |
| <i>K00003</i> | high-metabotype-depleted | 0.00013532 | peripheral |
| <i>K01028</i> | high-metabotype-depleted | 0.00013536 | peripheral |
| <i>K01029</i> | Other                    | 0.00013536 | peripheral |
| <i>K01027</i> | Other                    | 0.00013536 | peripheral |
| <i>K03021</i> | high-metabotype-depleted | 0.0001356  | peripheral |
| <i>K03040</i> | high-metabotype-depleted | 0.0001356  | peripheral |
| <i>K03048</i> | high-metabotype-depleted | 0.0001356  | peripheral |
| <i>K03046</i> | high-metabotype-depleted | 0.0001356  | peripheral |
| <i>K03044</i> | high-metabotype-depleted | 0.0001356  | peripheral |
| <i>K03043</i> | high-metabotype-depleted | 0.0001356  | peripheral |
| <i>K03010</i> | high-metabotype-depleted | 0.0001356  | peripheral |

|               |                            |            |            |
|---------------|----------------------------|------------|------------|
| <i>K03050</i> | high-metabotype-depleted   | 0.0001356  | peripheral |
| <i>K03053</i> | high-metabotype-depleted   | 0.0001356  | peripheral |
| <i>K13797</i> | high-metabotype-depleted   | 0.0001356  | peripheral |
| <i>K03060</i> | high-metabotype-depleted   | 0.0001356  | peripheral |
| <i>K03042</i> | Other                      | 0.0001356  | peripheral |
| <i>K03006</i> | Other                      | 0.0001356  | peripheral |
| <i>K02999</i> | Other                      | 0.0001356  | peripheral |
| <i>K03057</i> | Other                      | 0.0001356  | peripheral |
| <i>K03051</i> | Other                      | 0.0001356  | peripheral |
| <i>K03055</i> | Other                      | 0.0001356  | peripheral |
| <i>K13798</i> | Other                      | 0.0001356  | peripheral |
| <i>K03018</i> | high-metabotype-associated | 0.0001356  | peripheral |
| <i>K03056</i> | high-metabotype-associated | 0.0001356  | peripheral |
| <i>K03045</i> | high-metabotype-associated | 0.0001356  | peripheral |
| <i>K03047</i> | high-metabotype-associated | 0.0001356  | peripheral |
| <i>K03041</i> | high-metabotype-associated | 0.0001356  | peripheral |
| <i>K03049</i> | high-metabotype-enriched   | 0.0001356  | peripheral |
| <i>K03002</i> | Other                      | 0.0001356  | peripheral |
| <i>K03027</i> | Other                      | 0.0001356  | peripheral |
| <i>K03058</i> | Other                      | 0.0001356  | peripheral |
| <i>K03852</i> | high-metabotype-depleted   | 0.00013623 | peripheral |
| <i>K01804</i> | high-metabotype-depleted   | 0.00013664 | peripheral |
| <i>K00532</i> | high-metabotype-depleted   | 0.00014169 | peripheral |
| <i>K13950</i> | high-metabotype-depleted   | 0.00014169 | peripheral |
| <i>K01665</i> | high-metabotype-depleted   | 0.00014169 | peripheral |
| <i>K00533</i> | high-metabotype-depleted   | 0.00014169 | peripheral |

|               |                            |            |            |
|---------------|----------------------------|------------|------------|
| <i>K01664</i> | high-metabotype-depleted   | 0.00014169 | peripheral |
| <i>K06441</i> | Other                      | 0.00014169 | peripheral |
| <i>K00534</i> | Other                      | 0.00014169 | peripheral |
| <i>K10796</i> | high-metabotype-depleted   | 0.00014213 | peripheral |
| <i>K10795</i> | high-metabotype-depleted   | 0.00014213 | peripheral |
| <i>K10793</i> | high-metabotype-depleted   | 0.00014213 | peripheral |
| <i>K10794</i> | Other                      | 0.00014213 | peripheral |
| <i>K01753</i> | high-metabotype-depleted   | 0.00014281 | peripheral |
| <i>K02787</i> | Other                      | 0.00014294 | peripheral |
| <i>K02788</i> | Other                      | 0.00014294 | peripheral |
| <i>K02786</i> | Other                      | 0.00014294 | peripheral |
| <i>K00101</i> | Other                      | 0.00014388 | peripheral |
| <i>K05993</i> | high-metabotype-depleted   | 0.00014401 | peripheral |
| <i>K01252</i> | high-metabotype-depleted   | 0.00014401 | peripheral |
| <i>K00186</i> | high-metabotype-depleted   | 0.0001449  | peripheral |
| <i>K00187</i> | Other                      | 0.0001449  | peripheral |
| <i>K00188</i> | high-metabotype-associated | 0.0001449  | peripheral |
| <i>K01771</i> | Other                      | 0.00014647 | peripheral |
| <i>K02438</i> | high-metabotype-depleted   | 0.00014689 | peripheral |
| <i>K01236</i> | Other                      | 0.00014689 | peripheral |
| <i>K01491</i> | high-metabotype-depleted   | 0.00014693 | peripheral |
| <i>K13403</i> | Other                      | 0.00014693 | peripheral |
| <i>K03476</i> | high-metabotype-depleted   | 0.00014975 | peripheral |
| <i>K00385</i> | high-metabotype-depleted   | 0.00015059 | peripheral |
| <i>K00381</i> | Other                      | 0.00015059 | peripheral |
| <i>K00380</i> | Other                      | 0.00015059 | peripheral |
| <i>K00364</i> | high-metabotype-depleted   | 0.00015716 | peripheral |
| <i>K00050</i> | high-metabotype-depleted   | 0.00015856 | peripheral |



|               |                            |            |            |
|---------------|----------------------------|------------|------------|
| <i>K00975</i> | high-metabotype-depleted   | 0.00015998 | peripheral |
| <i>K01955</i> | high-metabotype-depleted   | 0.00016086 | peripheral |
| <i>K01956</i> | high-metabotype-depleted   | 0.00016086 | peripheral |
| <i>K01954</i> | high-metabotype-depleted   | 0.00016086 | peripheral |
| <i>K00077</i> | high-metabotype-depleted   | 0.00016109 | peripheral |
| <i>K00005</i> | high-metabotype-depleted   | 0.00016174 | peripheral |
| <i>K12251</i> | high-metabotype-depleted   | 0.00016288 | peripheral |
| <i>K01478</i> | Other                      | 0.00016447 | peripheral |
| <i>K14446</i> | Other                      | 0.00016731 | peripheral |
| <i>K01493</i> | high-metabotype-depleted   | 0.00016733 | peripheral |
| <i>K00207</i> | high-metabotype-depleted   | 0.0001703  | peripheral |
| <i>K00146</i> | high-metabotype-associated | 0.00017234 | peripheral |
| <i>K01494</i> | high-metabotype-depleted   | 0.00017296 | peripheral |
| <i>K00023</i> | high-metabotype-depleted   | 0.00017311 | peripheral |
| <i>K00705</i> | high-metabotype-depleted   | 0.00017544 | peripheral |
| <i>K01699</i> | high-metabotype-depleted   | 0.00017642 | peripheral |
| <i>K13919</i> | Other                      | 0.00017642 | peripheral |
| <i>K13920</i> | Other                      | 0.00017642 | peripheral |
| <i>K01775</i> | high-metabotype-depleted   | 0.00017944 | peripheral |
| <i>K00599</i> | high-metabotype-depleted   | 0.0001809  | peripheral |
| <i>K07732</i> | Other                      | 0.00018115 | peripheral |
| <i>K00861</i> | Other                      | 0.00018115 | peripheral |
| <i>K00860</i> | high-metabotype-depleted   | 0.00018259 | peripheral |
| <i>K03153</i> | Other                      | 0.00018341 | peripheral |
| <i>K00798</i> | high-metabotype-depleted   | 0.00018927 | peripheral |

|               |                            |            |              |
|---------------|----------------------------|------------|--------------|
| <i>K00102</i> | high-metabotype-depleted   | 0.00018927 | peripheral   |
| <i>K02435</i> | high-metabotype-depleted   | 0.00018951 | peripheral   |
| <i>K02434</i> | high-metabotype-depleted   | 0.00018951 | peripheral   |
| <i>K02433</i> | high-metabotype-depleted   | 0.00018951 | peripheral   |
| <i>K10783</i> | high-metabotype-depleted   | 0.00019185 | peripheral   |
| <i>K01087</i> | Other                      | 0.00019262 | peripheral   |
| <i>K00013</i> | high-metabotype-depleted   | 0.00019271 | peripheral   |
| <i>K05915</i> | Other                      | 0.00019308 | peripheral   |
| <i>K01845</i> | high-metabotype-depleted   | 0.00019379 | peripheral   |
| <i>K13942</i> | Other                      | 0.00019615 | peripheral   |
| <i>K00634</i> | high-metabotype-depleted   | 0.00019729 | peripheral   |
| <i>K01896</i> | Other                      | 0.00019729 | peripheral   |
| <i>K09903</i> | high-metabotype-depleted   | 0.00019889 | peripheral   |
| <i>K05343</i> | high-metabotype-depleted   | 0.00020036 | intermediate |
| <i>K01692</i> | high-metabotype-depleted   | 0.00020071 | intermediate |
| <i>K00499</i> | high-metabotype-associated | 0.00020289 | intermediate |
| <i>K00255</i> | high-metabotype-depleted   | 0.00020483 | intermediate |
| <i>K07512</i> | Other                      | 0.00020483 | intermediate |
| <i>K04487</i> | high-metabotype-depleted   | 0.00020498 | intermediate |
| <i>K00024</i> | high-metabotype-depleted   | 0.00020515 | intermediate |
| <i>K00051</i> | high-metabotype-depleted   | 0.00020515 | intermediate |
| <i>K00116</i> | high-metabotype-enriched   | 0.00020515 | intermediate |
| <i>K00025</i> | Other                      | 0.00020515 | intermediate |
| <i>K00026</i> | Other                      | 0.00020515 | intermediate |
| <i>K11381</i> | high-metabotype-depleted   | 0.00020527 | intermediate |

|               |                          |            |              |
|---------------|--------------------------|------------|--------------|
| <i>K00166</i> | Other                    | 0.00020527 | intermediate |
| <i>K00167</i> | Other                    | 0.00020527 | intermediate |
| <i>K00472</i> | high-metabotype-depleted | 0.00020572 | intermediate |
| <i>K00655</i> | high-metabotype-depleted | 0.00020602 | intermediate |
| <i>K13509</i> | high-metabotype-depleted | 0.00020602 | intermediate |
| <i>K00856</i> | high-metabotype-depleted | 0.00021039 | intermediate |
| <i>K01438</i> | high-metabotype-depleted | 0.00021304 | intermediate |
| <i>K00899</i> | high-metabotype-depleted | 0.00021523 | intermediate |
| <i>K00143</i> | high-metabotype-depleted | 0.00021869 | intermediate |
| <i>K01607</i> | high-metabotype-depleted | 0.00021954 | intermediate |
| <i>K03081</i> | Other                    | 0.00022225 | intermediate |
| <i>K01578</i> | high-metabotype-depleted | 0.00022287 | intermediate |
| <i>K09459</i> | high-metabotype-depleted | 0.00022568 | intermediate |
| <i>K01858</i> | high-metabotype-depleted | 0.00022644 | intermediate |
| <i>K01750</i> | high-metabotype-depleted | 0.00022844 | intermediate |
| <i>K00995</i> | high-metabotype-depleted | 0.00022884 | intermediate |
| <i>K00640</i> | high-metabotype-depleted | 0.00023171 | intermediate |
| <i>K03815</i> | high-metabotype-depleted | 0.00023428 | intermediate |
| <i>K02492</i> | high-metabotype-depleted | 0.00023529 | intermediate |
| <i>K00252</i> | Other                    | 0.00023694 | intermediate |
| <i>K01613</i> | high-metabotype-depleted | 0.00023794 | intermediate |
| <i>K09018</i> | Other                    | 0.00023998 | intermediate |
| <i>K09024</i> | Other                    | 0.00023998 | intermediate |
| <i>K00151</i> | high-metabotype-depleted | 0.00024344 | intermediate |
| <i>K10219</i> | Other                    | 0.00024344 | intermediate |

|               |                            |            |              |
|---------------|----------------------------|------------|--------------|
| <i>K00945</i> | high-metabotype-depleted   | 0.00024417 | intermediate |
| <i>K13800</i> | Other                      | 0.00024417 | intermediate |
| <i>K00762</i> | high-metabotype-depleted   | 0.00024478 | intermediate |
| <i>K11755</i> | high-metabotype-depleted   | 0.00024876 | intermediate |
| <i>K03735</i> | high-metabotype-depleted   | 0.00025504 | intermediate |
| <i>K03736</i> | high-metabotype-depleted   | 0.00025504 | intermediate |
| <i>K04019</i> | Other                      | 0.00025504 | intermediate |
| <i>K10527</i> | high-metabotype-depleted   | 0.00025543 | intermediate |
| <i>K03119</i> | high-metabotype-associated | 0.00025585 | intermediate |
| <i>K00931</i> | high-metabotype-depleted   | 0.00026041 | intermediate |
| <i>K01966</i> | high-metabotype-depleted   | 0.00026172 | intermediate |
| <i>K01965</i> | Other                      | 0.00026172 | intermediate |
| <i>K02626</i> | high-metabotype-depleted   | 0.00026237 | intermediate |
| <i>K01585</i> | high-metabotype-depleted   | 0.00026237 | intermediate |
| <i>K01584</i> | high-metabotype-depleted   | 0.00026237 | intermediate |
| <i>K01583</i> | Other                      | 0.00026237 | intermediate |
| <i>K00610</i> | high-metabotype-depleted   | 0.00026719 | intermediate |
| <i>K00609</i> | high-metabotype-depleted   | 0.00026719 | intermediate |
| <i>K02500</i> | high-metabotype-depleted   | 0.00027576 | intermediate |
| <i>K02501</i> | high-metabotype-depleted   | 0.00027576 | intermediate |
| <i>K01663</i> | high-metabotype-associated | 0.00027576 | intermediate |
| <i>K00226</i> | high-metabotype-depleted   | 0.00028187 | intermediate |
| <i>K05713</i> | Other                      | 0.00028252 | intermediate |
| <i>K07031</i> | high-metabotype-depleted   | 0.00028355 | intermediate |

|               |                            |            |              |
|---------------|----------------------------|------------|--------------|
| <i>K00030</i> | high-metabotype-depleted   | 0.00028381 | intermediate |
| <i>K03430</i> | Other                      | 0.0002839  | intermediate |
| <i>K09469</i> | high-metabotype-associated | 0.0002839  | intermediate |
| <i>K01745</i> | high-metabotype-depleted   | 0.00028449 | intermediate |
| <i>K01183</i> | high-metabotype-depleted   | 0.00028461 | intermediate |
| <i>K13381</i> | high-metabotype-associated | 0.00028461 | intermediate |
| <i>K01689</i> | high-metabotype-depleted   | 0.000285   | intermediate |
| <i>K00818</i> | high-metabotype-depleted   | 0.00028502 | intermediate |
| <i>K00854</i> | high-metabotype-depleted   | 0.00028611 | intermediate |
| <i>K00547</i> | high-metabotype-depleted   | 0.00029142 | intermediate |
| <i>K01679</i> | high-metabotype-depleted   | 0.00029149 | intermediate |
| <i>K01676</i> | high-metabotype-depleted   | 0.00029149 | intermediate |
| <i>K01678</i> | high-metabotype-depleted   | 0.00029149 | intermediate |
| <i>K01677</i> | high-metabotype-depleted   | 0.00029149 | intermediate |
| <i>K03379</i> | high-metabotype-depleted   | 0.00029342 | intermediate |
| <i>K09021</i> | high-metabotype-depleted   | 0.00029533 | intermediate |
| <i>K03462</i> | high-metabotype-depleted   | 0.00029648 | intermediate |
| <i>K01897</i> | high-metabotype-depleted   | 0.00029986 | intermediate |
| <i>K00955</i> | high-metabotype-depleted   | 0.00030498 | intermediate |
| <i>K13811</i> | high-metabotype-enriched   | 0.00030498 | intermediate |
| <i>K01706</i> | high-metabotype-depleted   | 0.0003118  | intermediate |
| <i>K01617</i> | Other                      | 0.00032071 | intermediate |
| <i>K00549</i> | high-metabotype-depleted   | 0.00032118 | intermediate |

|               |                            |            |              |
|---------------|----------------------------|------------|--------------|
| <i>K01917</i> | high-metabotype-depleted   | 0.00033709 | intermediate |
| <i>K01460</i> | high-metabotype-depleted   | 0.00033709 | intermediate |
| <i>K01597</i> | Other                      | 0.00033922 | intermediate |
| <i>K01814</i> | high-metabotype-depleted   | 0.00034177 | intermediate |
| <i>K03184</i> | high-metabotype-associated | 0.00034493 | intermediate |
| <i>K06134</i> | Other                      | 0.00034493 | intermediate |
| <i>K00763</i> | high-metabotype-depleted   | 0.00035282 | intermediate |
| <i>K04020</i> | Other                      | 0.00035312 | intermediate |
| <i>K01823</i> | high-metabotype-associated | 0.00035481 | intermediate |
| <i>K00928</i> | high-metabotype-depleted   | 0.00035483 | intermediate |
| <i>K01115</i> | Other                      | 0.00035662 | intermediate |
| <i>K13922</i> | Other                      | 0.00035751 | intermediate |
| <i>K00883</i> | high-metabotype-depleted   | 0.00035865 | intermediate |
| <i>K02560</i> | high-metabotype-depleted   | 0.00035966 | intermediate |
| <i>K01673</i> | high-metabotype-depleted   | 0.00036085 | intermediate |
| <i>K01674</i> | Other                      | 0.00036085 | intermediate |
| <i>K00951</i> | high-metabotype-depleted   | 0.00036186 | intermediate |
| <i>K07816</i> | high-metabotype-depleted   | 0.00036186 | intermediate |
| <i>K00757</i> | high-metabotype-depleted   | 0.00036817 | intermediate |
| <i>K00248</i> | high-metabotype-depleted   | 0.00036872 | intermediate |
| <i>K09478</i> | Other                      | 0.00036872 | intermediate |
| <i>K03335</i> | high-metabotype-depleted   | 0.0003737  | intermediate |
| <i>K13763</i> | Other                      | 0.00037462 | intermediate |
| <i>K14084</i> | high-metabotype-depleted   | 0.0003783  | intermediate |
| <i>K14083</i> | high-metabotype-associated | 0.0003783  | intermediate |
| <i>K14082</i> | Other                      | 0.0003783  | intermediate |

|               |                            |            |              |
|---------------|----------------------------|------------|--------------|
| <i>K03526</i> | high-metabotype-depleted   | 0.00037858 | intermediate |
| <i>K09020</i> | Other                      | 0.00037939 | intermediate |
| <i>K00756</i> | high-metabotype-depleted   | 0.00037942 | intermediate |
| <i>K00016</i> | high-metabotype-depleted   | 0.00037947 | intermediate |
| <i>K11261</i> | Other                      | 0.00038719 | intermediate |
| <i>K00202</i> | Other                      | 0.00038719 | intermediate |
| <i>K11260</i> | Other                      | 0.00038719 | intermediate |
| <i>K00200</i> | high-metabotype-associated | 0.00038719 | intermediate |
| <i>K00203</i> | high-metabotype-associated | 0.00038719 | intermediate |
| <i>K00205</i> | high-metabotype-associated | 0.00038719 | intermediate |
| <i>K00201</i> | high-metabotype-associated | 0.00038719 | intermediate |
| <i>K00204</i> | high-metabotype-associated | 0.00038719 | intermediate |
| <i>K01923</i> | high-metabotype-depleted   | 0.0003876  | intermediate |
| <i>K01728</i> | high-metabotype-depleted   | 0.00038909 | intermediate |
| <i>K01731</i> | Other                      | 0.00038909 | intermediate |
| <i>K09472</i> | high-metabotype-associated | 0.00039059 | intermediate |
| <i>K01776</i> | high-metabotype-depleted   | 0.00039681 | intermediate |
| <i>K00286</i> | high-metabotype-depleted   | 0.00040025 | intermediate |
| <i>K00210</i> | high-metabotype-depleted   | 0.0004052  | intermediate |
| <i>K04517</i> | high-metabotype-depleted   | 0.0004052  | intermediate |
| <i>K01589</i> | high-metabotype-depleted   | 0.00041197 | intermediate |
| <i>K00536</i> | Other                      | 0.00041292 | intermediate |
| <i>K02790</i> | high-metabotype-depleted   | 0.00041846 | intermediate |
| <i>K02791</i> | high-metabotype-depleted   | 0.00041846 | intermediate |

|               |                            |            |              |
|---------------|----------------------------|------------|--------------|
| <i>K01632</i> | high-metabotype-depleted   | 0.00041909 | intermediate |
| <i>K00052</i> | high-metabotype-depleted   | 0.00042582 | intermediate |
| <i>K01620</i> | high-metabotype-depleted   | 0.00042586 | intermediate |
| <i>K02778</i> | high-metabotype-depleted   | 0.00043344 | intermediate |
| <i>K02779</i> | high-metabotype-depleted   | 0.00043344 | intermediate |
| <i>K03078</i> | high-metabotype-associated | 0.0004366  | intermediate |
| <i>K05884</i> | high-metabotype-depleted   | 0.00044206 | intermediate |
| <i>K03394</i> | high-metabotype-depleted   | 0.0004463  | intermediate |
| <i>K02304</i> | high-metabotype-depleted   | 0.0004463  | intermediate |
| <i>K01091</i> | high-metabotype-depleted   | 0.0004467  | intermediate |
| <i>K06132</i> | high-metabotype-depleted   | 0.0004471  | intermediate |
| <i>K06131</i> | high-metabotype-depleted   | 0.0004471  | intermediate |
| <i>K13498</i> | high-metabotype-depleted   | 0.00044764 | intermediate |
| <i>K00432</i> | high-metabotype-depleted   | 0.00044944 | intermediate |
| <i>K00318</i> | high-metabotype-depleted   | 0.00045066 | intermediate |
| <i>K11788</i> | Other                      | 0.00045283 | intermediate |
| <i>K01768</i> | high-metabotype-depleted   | 0.00045429 | intermediate |
| <i>K05873</i> | Other                      | 0.00045429 | intermediate |
| <i>K05851</i> | high-metabotype-associated | 0.00045429 | intermediate |
| <i>K11029</i> | Other                      | 0.00045429 | intermediate |
| <i>K05362</i> | high-metabotype-depleted   | 0.00046408 | intermediate |
| <i>K00925</i> | high-metabotype-depleted   | 0.00046817 | intermediate |
| <i>K01902</i> | high-metabotype-depleted   | 0.00047    | intermediate |



|               |                          |            |              |
|---------------|--------------------------|------------|--------------|
| <i>K01903</i> | high-metabotype-depleted | 0.00047    | intermediate |
| <i>K01899</i> | Other                    | 0.00047    | intermediate |
| <i>K01900</i> | Other                    | 0.00047    | intermediate |
| <i>K12657</i> | high-metabotype-depleted | 0.00047036 | intermediate |
| <i>K03778</i> | high-metabotype-depleted | 0.00047181 | intermediate |
| <i>K03777</i> | high-metabotype-depleted | 0.00047181 | intermediate |
| <i>K00657</i> | high-metabotype-depleted | 0.00048159 | intermediate |
| <i>K00108</i> | high-metabotype-depleted | 0.00048287 | intermediate |
| <i>K11440</i> | high-metabotype-depleted | 0.00048287 | intermediate |
| <i>K01783</i> | high-metabotype-depleted | 0.0004873  | intermediate |
| <i>K02554</i> | Other                    | 0.00049075 | intermediate |
| <i>K00568</i> | high-metabotype-depleted | 0.00049168 | intermediate |
| <i>K00449</i> | high-metabotype-depleted | 0.00049431 | intermediate |
| <i>K00448</i> | Other                    | 0.00049431 | intermediate |
| <i>K00606</i> | high-metabotype-depleted | 0.0004987  | intermediate |
| <i>K05364</i> | high-metabotype-depleted | 0.00050302 | intermediate |
| <i>K00293</i> | Other                    | 0.00050452 | intermediate |
| <i>K01875</i> | high-metabotype-depleted | 0.00050616 | intermediate |
| <i>K01480</i> | high-metabotype-depleted | 0.00050887 | intermediate |
| <i>K00078</i> | high-metabotype-depleted | 0.00050952 | intermediate |
| <i>K00075</i> | high-metabotype-depleted | 0.00050982 | intermediate |
| <i>K00917</i> | Other                    | 0.00051095 | intermediate |
| <i>K11517</i> | high-metabotype-depleted | 0.00051289 | intermediate |
| <i>K00104</i> | high-metabotype-depleted | 0.00051289 | intermediate |

|               |                            |            |              |
|---------------|----------------------------|------------|--------------|
| <i>K11473</i> | high-metabotype-depleted   | 0.00051289 | intermediate |
| <i>K11472</i> | Other                      | 0.00051289 | intermediate |
| <i>K01479</i> | high-metabotype-depleted   | 0.00051379 | intermediate |
| <i>K02536</i> | high-metabotype-depleted   | 0.00051648 | intermediate |
| <i>K01734</i> | high-metabotype-depleted   | 0.0005281  | intermediate |
| <i>K01788</i> | high-metabotype-depleted   | 0.00052884 | intermediate |
| <i>K00991</i> | high-metabotype-depleted   | 0.000529   | intermediate |
| <i>K01913</i> | high-metabotype-depleted   | 0.00053081 | intermediate |
| <i>K10213</i> | high-metabotype-associated | 0.00053949 | intermediate |
| <i>K00259</i> | high-metabotype-depleted   | 0.00054203 | intermediate |
| <i>K01592</i> | high-metabotype-depleted   | 0.00054318 | intermediate |
| <i>K11808</i> | Other                      | 0.00054646 | intermediate |
| <i>K00930</i> | high-metabotype-depleted   | 0.00054922 | intermediate |
| <i>K06989</i> | high-metabotype-depleted   | 0.00055189 | intermediate |
| <i>K00008</i> | high-metabotype-depleted   | 0.00055238 | intermediate |
| <i>K09758</i> | high-metabotype-depleted   | 0.00055547 | intermediate |
| <i>K00368</i> | Other                      | 0.00055707 | intermediate |
| <i>K00849</i> | high-metabotype-depleted   | 0.00056058 | intermediate |
| <i>K05823</i> | high-metabotype-depleted   | 0.00056143 | intermediate |
| <i>K05936</i> | high-metabotype-depleted   | 0.00056429 | intermediate |
| <i>K00611</i> | high-metabotype-depleted   | 0.0005662  | intermediate |
| <i>K02232</i> | high-metabotype-depleted   | 0.00056781 | intermediate |
| <i>K11752</i> | high-metabotype-depleted   | 0.00056781 | intermediate |

|               |                            |            |              |
|---------------|----------------------------|------------|--------------|
| <i>K00900</i> | high-metabotype-enriched   | 0.00056781 | intermediate |
| <i>K01498</i> | Other                      | 0.00056781 | intermediate |
| <i>K01659</i> | high-metabotype-depleted   | 0.00056787 | intermediate |
| <i>K10675</i> | Other                      | 0.00056795 | intermediate |
| <i>K00889</i> | high-metabotype-depleted   | 0.00056816 | intermediate |
| <i>K01524</i> | high-metabotype-depleted   | 0.00056816 | intermediate |
| <i>K01514</i> | high-metabotype-depleted   | 0.00056816 | intermediate |
| <i>K01843</i> | high-metabotype-depleted   | 0.00056851 | intermediate |
| <i>K03273</i> | high-metabotype-depleted   | 0.00056851 | intermediate |
| <i>K05363</i> | high-metabotype-depleted   | 0.00056851 | intermediate |
| <i>K01103</i> | high-metabotype-enriched   | 0.00056851 | intermediate |
| <i>K01455</i> | Other                      | 0.00056866 | intermediate |
| <i>K01423</i> | high-metabotype-depleted   | 0.00056886 | intermediate |
| <i>K06013</i> | Other                      | 0.00056886 | intermediate |
| <i>K10220</i> | Other                      | 0.00056886 | intermediate |
| <i>K08693</i> | Other                      | 0.00056921 | intermediate |
| <i>K01759</i> | high-metabotype-depleted   | 0.00056947 | intermediate |
| <i>K13018</i> | high-metabotype-depleted   | 0.00056992 | intermediate |
| <i>K05603</i> | Other                      | 0.00057085 | intermediate |
| <i>K01458</i> | high-metabotype-depleted   | 0.00057156 | intermediate |
| <i>K05822</i> | high-metabotype-associated | 0.00057418 | intermediate |
| <i>K03151</i> | high-metabotype-depleted   | 0.00057564 | intermediate |
| <i>K01639</i> | high-metabotype-depleted   | 0.00057647 | intermediate |
| <i>K01468</i> | high-metabotype-depleted   | 0.00057659 | intermediate |
| <i>K11212</i> | high-metabotype-associated | 0.00057707 | intermediate |

|               |                            |            |              |
|---------------|----------------------------|------------|--------------|
| <i>K00793</i> | high-metabotype-depleted   | 0.00057886 | intermediate |
| <i>K00376</i> | high-metabotype-enriched   | 0.00057887 | intermediate |
| <i>K00604</i> | high-metabotype-depleted   | 0.00058106 | intermediate |
| <i>K01048</i> | high-metabotype-depleted   | 0.00058915 | intermediate |
| <i>K01126</i> | high-metabotype-depleted   | 0.00058985 | intermediate |
| <i>K01079</i> | high-metabotype-depleted   | 0.00059566 | intermediate |
| <i>K01654</i> | high-metabotype-depleted   | 0.00060501 | intermediate |
| <i>K05304</i> | high-metabotype-enriched   | 0.00060501 | intermediate |
| <i>K01187</i> | high-metabotype-depleted   | 0.00061455 | intermediate |
| <i>K12316</i> | Other                      | 0.00061455 | intermediate |
| <i>K07130</i> | high-metabotype-depleted   | 0.00061689 | intermediate |
| <i>K00799</i> | Other                      | 0.00062447 | intermediate |
| <i>K01226</i> | high-metabotype-depleted   | 0.00062478 | intermediate |
| <i>K04518</i> | high-metabotype-depleted   | 0.00062574 | intermediate |
| <i>K01713</i> | Other                      | 0.00062574 | intermediate |
| <i>K00217</i> | high-metabotype-associated | 0.00062701 | intermediate |
| <i>K01556</i> | high-metabotype-associated | 0.00063113 | intermediate |
| <i>K01924</i> | high-metabotype-depleted   | 0.0006324  | intermediate |
| <i>K01682</i> | high-metabotype-depleted   | 0.00063305 | intermediate |
| <i>K00135</i> | Other                      | 0.00064553 | intermediate |
| <i>K01958</i> | high-metabotype-depleted   | 0.00065735 | intermediate |
| <i>K01960</i> | high-metabotype-depleted   | 0.00065735 | intermediate |
| <i>K01959</i> | high-metabotype-depleted   | 0.00065735 | intermediate |

|               |                            |            |              |
|---------------|----------------------------|------------|--------------|
| <i>K05921</i> | high-metabotype-depleted   | 0.00065755 | intermediate |
| <i>K10764</i> | high-metabotype-depleted   | 0.00066414 | intermediate |
| <i>K01733</i> | high-metabotype-depleted   | 0.00066586 | intermediate |
| <i>K00058</i> | high-metabotype-depleted   | 0.00066587 | intermediate |
| <i>K08093</i> | high-metabotype-depleted   | 0.00067533 | intermediate |
| <i>K00430</i> | Other                      | 0.00067583 | intermediate |
| <i>K02783</i> | high-metabotype-depleted   | 0.00067775 | intermediate |
| <i>K02781</i> | high-metabotype-depleted   | 0.00067775 | intermediate |
| <i>K02782</i> | high-metabotype-depleted   | 0.00067775 | intermediate |
| <i>K00952</i> | high-metabotype-depleted   | 0.00068281 | intermediate |
| <i>K00969</i> | high-metabotype-depleted   | 0.00068281 | intermediate |
| <i>K13522</i> | Other                      | 0.00068281 | intermediate |
| <i>K00220</i> | Other                      | 0.000683   | intermediate |
| <i>K00109</i> | Other                      | 0.00068834 | intermediate |
| <i>K00826</i> | high-metabotype-depleted   | 0.00069085 | intermediate |
| <i>K00263</i> | Other                      | 0.00069085 | intermediate |
| <i>K01810</i> | high-metabotype-depleted   | 0.00069089 | intermediate |
| <i>K06859</i> | high-metabotype-depleted   | 0.00069089 | intermediate |
| <i>K08097</i> | high-metabotype-associated | 0.00069483 | intermediate |
| <i>K00892</i> | high-metabotype-depleted   | 0.00070238 | intermediate |
| <i>K11781</i> | Other                      | 0.00070467 | intermediate |
| <i>K11780</i> | high-metabotype-associated | 0.00070467 | intermediate |
| <i>K01581</i> | high-metabotype-depleted   | 0.0007072  | intermediate |
| <i>K01040</i> | high-metabotype-depleted   | 0.00070868 | intermediate |

|               |                            |            |              |
|---------------|----------------------------|------------|--------------|
| <i>K01039</i> | high-metabotype-depleted   | 0.00070868 | intermediate |
| <i>K01928</i> | high-metabotype-depleted   | 0.00071116 | intermediate |
| <i>K01489</i> | high-metabotype-depleted   | 0.00071919 | intermediate |
| <i>K01922</i> | high-metabotype-depleted   | 0.00072095 | intermediate |
| <i>K01075</i> | Other                      | 0.00072111 | intermediate |
| <i>K01693</i> | high-metabotype-depleted   | 0.00072365 | intermediate |
| <i>K01819</i> | Other                      | 0.00072674 | intermediate |
| <i>K07173</i> | high-metabotype-depleted   | 0.00072803 | intermediate |
| <i>K01619</i> | high-metabotype-depleted   | 0.00073033 | intermediate |
| <i>K01726</i> | high-metabotype-depleted   | 0.0007463  | intermediate |
| <i>K01841</i> | high-metabotype-depleted   | 0.00075556 | intermediate |
| <i>K08260</i> | Other                      | 0.00075602 | intermediate |
| <i>K03782</i> | high-metabotype-associated | 0.00076074 | intermediate |
| <i>K06133</i> | high-metabotype-depleted   | 0.00076247 | intermediate |
| <i>K00997</i> | high-metabotype-depleted   | 0.00076247 | intermediate |
| <i>K00034</i> | high-metabotype-depleted   | 0.00076828 | intermediate |
| <i>K01433</i> | high-metabotype-depleted   | 0.00077054 | intermediate |
| <i>K00858</i> | high-metabotype-depleted   | 0.0007732  | intermediate |
| <i>K00324</i> | high-metabotype-depleted   | 0.0007732  | intermediate |
| <i>K00325</i> | Other                      | 0.0007732  | intermediate |
| <i>K00322</i> | Other                      | 0.0007732  | intermediate |
| <i>K00323</i> | Other                      | 0.0007732  | intermediate |
| <i>K11175</i> | high-metabotype-depleted   | 0.00078603 | intermediate |
| <i>K08289</i> | high-metabotype-depleted   | 0.00078603 | intermediate |
| <i>K00601</i> | Other                      | 0.00078603 | intermediate |

|               |                            |            |              |
|---------------|----------------------------|------------|--------------|
| <i>K05551</i> | high-metabotype-depleted   | 0.00079068 | intermediate |
| <i>K05552</i> | Other                      | 0.00079068 | intermediate |
| <i>K06215</i> | high-metabotype-depleted   | 0.00079498 | intermediate |
| <i>K08681</i> | high-metabotype-depleted   | 0.00079498 | intermediate |
| <i>K03337</i> | high-metabotype-depleted   | 0.00080433 | intermediate |
| <i>K00672</i> | high-metabotype-associated | 0.00081655 | intermediate |
| <i>K00045</i> | high-metabotype-depleted   | 0.00081947 | intermediate |
| <i>K00619</i> | high-metabotype-depleted   | 0.00082215 | intermediate |
| <i>K00865</i> | high-metabotype-depleted   | 0.00082383 | intermediate |
| <i>K01740</i> | high-metabotype-depleted   | 0.00083694 | intermediate |
| <i>K01736</i> | high-metabotype-depleted   | 0.00083758 | intermediate |
| <i>K03077</i> | high-metabotype-depleted   | 0.00084079 | intermediate |
| <i>K01786</i> | high-metabotype-depleted   | 0.00084079 | intermediate |
| <i>K03080</i> | high-metabotype-associated | 0.00084079 | intermediate |
| <i>K01940</i> | high-metabotype-depleted   | 0.00084371 | intermediate |
| <i>K05349</i> | high-metabotype-depleted   | 0.0008439  | intermediate |
| <i>K01188</i> | high-metabotype-depleted   | 0.0008439  | intermediate |
| <i>K05350</i> | Other                      | 0.0008439  | intermediate |
| <i>K02619</i> | high-metabotype-depleted   | 0.00085224 | intermediate |
| <i>K13020</i> | high-metabotype-depleted   | 0.00085329 | intermediate |
| <i>K13016</i> | high-metabotype-depleted   | 0.00085329 | intermediate |
| <i>K09699</i> | Other                      | 0.00085477 | intermediate |
| <i>K00962</i> | high-metabotype-depleted   | 0.00085601 | intermediate |

|               |                            |            |              |
|---------------|----------------------------|------------|--------------|
| <i>K13954</i> | high-metabotype-depleted   | 0.00085882 | intermediate |
| <i>K01919</i> | high-metabotype-depleted   | 0.00085983 | intermediate |
| <i>K11204</i> | Other                      | 0.00085983 | intermediate |
| <i>K03715</i> | high-metabotype-depleted   | 0.00087051 | intermediate |
| <i>K14333</i> | Other                      | 0.0008716  | intermediate |
| <i>K01232</i> | high-metabotype-depleted   | 0.00087377 | intermediate |
| <i>K01805</i> | high-metabotype-depleted   | 0.00087819 | intermediate |
| <i>K02770</i> | high-metabotype-depleted   | 0.00088325 | intermediate |
| <i>K02769</i> | high-metabotype-depleted   | 0.00088325 | intermediate |
| <i>K02768</i> | high-metabotype-depleted   | 0.00088325 | intermediate |
| <i>K01885</i> | high-metabotype-depleted   | 0.00089055 | intermediate |
| <i>K00769</i> | high-metabotype-depleted   | 0.00089061 | intermediate |
| <i>K03816</i> | high-metabotype-depleted   | 0.00089061 | intermediate |
| <i>K06153</i> | high-metabotype-depleted   | 0.00090729 | intermediate |
| <i>K00122</i> | high-metabotype-depleted   | 0.00090731 | intermediate |
| <i>K00124</i> | high-metabotype-depleted   | 0.00090731 | intermediate |
| <i>K00127</i> | high-metabotype-depleted   | 0.00090731 | intermediate |
| <i>K00123</i> | high-metabotype-depleted   | 0.00090731 | intermediate |
| <i>K08348</i> | Other                      | 0.00090731 | intermediate |
| <i>K08350</i> | Other                      | 0.00090731 | intermediate |
| <i>K08349</i> | Other                      | 0.00090731 | intermediate |
| <i>K00125</i> | high-metabotype-associated | 0.00090731 | intermediate |
| <i>K00126</i> | Other                      | 0.00090731 | intermediate |
| <i>K01658</i> | high-metabotype-depleted   | 0.00091962 | intermediate |



|               |                            |            |              |
|---------------|----------------------------|------------|--------------|
| <i>K01657</i> | high-metabotype-depleted   | 0.00091962 | intermediate |
| <i>K14471</i> | Other                      | 0.00093066 | intermediate |
| <i>K14472</i> | Other                      | 0.00093066 | intermediate |
| <i>K00869</i> | high-metabotype-associated | 0.00093124 | intermediate |
| <i>K01610</i> | high-metabotype-depleted   | 0.00093953 | intermediate |
| <i>K01596</i> | high-metabotype-depleted   | 0.00093953 | intermediate |
| <i>K02302</i> | high-metabotype-depleted   | 0.00094428 | intermediate |
| <i>K00022</i> | high-metabotype-depleted   | 0.00094719 | intermediate |
| <i>K00658</i> | high-metabotype-depleted   | 0.00094926 | intermediate |
| <i>K00258</i> | high-metabotype-associated | 0.00094942 | intermediate |
| <i>K00007</i> | Other                      | 0.000952   | intermediate |
| <i>K06445</i> | high-metabotype-depleted   | 0.00095241 | intermediate |
| <i>K13247</i> | Other                      | 0.00095323 | intermediate |
| <i>K01521</i> | Other                      | 0.00095488 | intermediate |
| <i>K00694</i> | high-metabotype-depleted   | 0.00095553 | intermediate |
| <i>K00158</i> | Other                      | 0.00095951 | intermediate |
| <i>K03472</i> | high-metabotype-associated | 0.00096432 | intermediate |
| <i>K00027</i> | high-metabotype-depleted   | 0.00096444 | intermediate |
| <i>K00789</i> | high-metabotype-depleted   | 0.00096808 | intermediate |
| <i>K00625</i> | high-metabotype-depleted   | 0.0009691  | intermediate |
| <i>K13788</i> | high-metabotype-depleted   | 0.0009691  | intermediate |
| <i>K02586</i> | high-metabotype-depleted   | 0.00096999 | intermediate |
| <i>K02591</i> | high-metabotype-depleted   | 0.00096999 | intermediate |
| <i>K02588</i> | high-metabotype-depleted   | 0.00096999 | intermediate |

|               |                            |            |              |
|---------------|----------------------------|------------|--------------|
| <i>K01803</i> | high-metabotype-depleted   | 0.00097036 | intermediate |
| <i>K00302</i> | high-metabotype-depleted   | 0.00097068 | intermediate |
| <i>K00303</i> | Other                      | 0.00097068 | intermediate |
| <i>K00301</i> | high-metabotype-associated | 0.00097068 | intermediate |
| <i>K00314</i> | Other                      | 0.00097068 | intermediate |
| <i>K00886</i> | Other                      | 0.0009731  | intermediate |
| <i>K02535</i> | high-metabotype-depleted   | 0.00099461 | intermediate |
| <i>K00054</i> | Other                      | 0.00099625 | intermediate |
| <i>K00021</i> | high-metabotype-associated | 0.00099625 | intermediate |
| <i>K12112</i> | Other                      | 0.00099674 | intermediate |
| <i>K12111</i> | Other                      | 0.00099674 | intermediate |
| <i>K01694</i> | high-metabotype-depleted   | 0.0009998  | intermediate |
| <i>K01239</i> | high-metabotype-depleted   | 0.00100015 | intermediate |
| <i>K01120</i> | high-metabotype-associated | 0.00100676 | intermediate |
| <i>K13298</i> | Other                      | 0.00100676 | intermediate |
| <i>K04108</i> | high-metabotype-depleted   | 0.00101046 | intermediate |
| <i>K01182</i> | high-metabotype-depleted   | 0.00101251 | intermediate |
| <i>K01089</i> | high-metabotype-depleted   | 0.0010186  | intermediate |
| <i>K13967</i> | Other                      | 0.00102047 | intermediate |
| <i>K05606</i> | Other                      | 0.00103629 | intermediate |
| <i>K00772</i> | Other                      | 0.00103964 | intermediate |
| <i>K00981</i> | high-metabotype-depleted   | 0.00103966 | intermediate |
| <i>K00831</i> | high-metabotype-depleted   | 0.00105027 | intermediate |
| <i>K00319</i> | high-metabotype-associated | 0.00105691 | intermediate |
| <i>K12234</i> | high-metabotype-associated | 0.00105892 | intermediate |
| <i>K01778</i> | high-metabotype-depleted   | 0.00107186 | intermediate |

|               |                          |            |              |
|---------------|--------------------------|------------|--------------|
| <i>K01886</i> | high-metabotype-depleted | 0.00107586 | intermediate |
| <i>K00526</i> | high-metabotype-depleted | 0.00108062 | intermediate |
| <i>K00525</i> | high-metabotype-depleted | 0.00108062 | intermediate |
| <i>K00018</i> | high-metabotype-depleted | 0.00110198 | intermediate |
| <i>K00015</i> | high-metabotype-depleted | 0.00110198 | intermediate |
| <i>K01067</i> | high-metabotype-depleted | 0.0011021  | intermediate |
| <i>K00851</i> | high-metabotype-depleted | 0.0011091  | intermediate |
| <i>K01012</i> | high-metabotype-depleted | 0.00110997 | intermediate |
| <i>K00790</i> | high-metabotype-depleted | 0.00111162 | intermediate |
| <i>K00215</i> | high-metabotype-depleted | 0.00111185 | intermediate |
| <i>K01431</i> | Other                    | 0.0011166  | intermediate |
| <i>K00006</i> | high-metabotype-depleted | 0.00111773 | intermediate |
| <i>K00113</i> | high-metabotype-depleted | 0.00111773 | intermediate |
| <i>K00112</i> | high-metabotype-depleted | 0.00111773 | intermediate |
| <i>K00111</i> | high-metabotype-depleted | 0.00111773 | intermediate |
| <i>K00057</i> | high-metabotype-depleted | 0.00111773 | intermediate |
| <i>K03399</i> | Other                    | 0.0011321  | intermediate |
| <i>K03644</i> | high-metabotype-depleted | 0.00113491 | intermediate |
| <i>K03801</i> | high-metabotype-depleted | 0.00113491 | intermediate |
| <i>K03637</i> | high-metabotype-depleted | 0.00113491 | intermediate |
| <i>K03639</i> | high-metabotype-depleted | 0.00113491 | intermediate |
| <i>K10815</i> | Other                    | 0.00113526 | intermediate |
| <i>K01034</i> | high-metabotype-depleted | 0.0011363  | intermediate |

|               |                            |            |              |
|---------------|----------------------------|------------|--------------|
| <i>K01035</i> | high-metabotype-depleted   | 0.0011363  | intermediate |
| <i>K01711</i> | high-metabotype-depleted   | 0.00113631 | intermediate |
| <i>K01790</i> | high-metabotype-depleted   | 0.00113631 | intermediate |
| <i>K01911</i> | high-metabotype-depleted   | 0.00113631 | intermediate |
| <i>K03270</i> | high-metabotype-depleted   | 0.00113631 | intermediate |
| <i>K01904</i> | high-metabotype-depleted   | 0.00113631 | intermediate |
| <i>K01799</i> | high-metabotype-depleted   | 0.00113631 | intermediate |
| <i>K12660</i> | high-metabotype-depleted   | 0.00113631 | intermediate |
| <i>K02301</i> | high-metabotype-depleted   | 0.00113631 | intermediate |
| <i>K02473</i> | high-metabotype-depleted   | 0.00113631 | intermediate |
| <i>K07535</i> | Other                      | 0.00113631 | intermediate |
| <i>K00801</i> | Other                      | 0.00113631 | intermediate |
| <i>K03821</i> | Other                      | 0.00113631 | intermediate |
| <i>K01846</i> | high-metabotype-associated | 0.00113631 | intermediate |
| <i>K08295</i> | high-metabotype-associated | 0.00113631 | intermediate |
| <i>K03894</i> | high-metabotype-associated | 0.00113631 | intermediate |
| <i>K06123</i> | high-metabotype-associated | 0.00113631 | intermediate |
| <i>K10027</i> | Other                      | 0.00113631 | intermediate |
| <i>K01575</i> | Other                      | 0.00113702 | intermediate |
| <i>K05954</i> | Other                      | 0.00113702 | intermediate |
| <i>K01223</i> | high-metabotype-depleted   | 0.0011386  | intermediate |
| <i>K01222</i> | high-metabotype-depleted   | 0.0011386  | intermediate |
| <i>K13017</i> | high-metabotype-depleted   | 0.00113913 | intermediate |
| <i>K00876</i> | high-metabotype-depleted   | 0.00114187 | intermediate |

|               |                            |            |              |
|---------------|----------------------------|------------|--------------|
| <i>K00275</i> | high-metabotype-depleted   | 0.00114741 | intermediate |
| <i>K00868</i> | high-metabotype-depleted   | 0.00114741 | intermediate |
| <i>K03148</i> | high-metabotype-depleted   | 0.00115162 | intermediate |
| <i>K01681</i> | high-metabotype-depleted   | 0.00115396 | intermediate |
| <i>K00884</i> | high-metabotype-associated | 0.0011573  | intermediate |
| <i>K00949</i> | high-metabotype-depleted   | 0.00115737 | intermediate |
| <i>K00457</i> | Other                      | 0.0011621  | intermediate |
| <i>K10217</i> | Other                      | 0.00116651 | intermediate |
| <i>K00208</i> | high-metabotype-depleted   | 0.00116691 | intermediate |
| <i>K01070</i> | high-metabotype-depleted   | 0.00117345 | intermediate |
| <i>K05711</i> | Other                      | 0.00118299 | intermediate |
| <i>K06001</i> | high-metabotype-depleted   | 0.00118907 | intermediate |
| <i>K01695</i> | high-metabotype-depleted   | 0.00118907 | intermediate |
| <i>K01696</i> | high-metabotype-depleted   | 0.00118907 | intermediate |
| <i>K07106</i> | high-metabotype-depleted   | 0.00119113 | intermediate |
| <i>K04110</i> | Other                      | 0.00119243 | intermediate |
| <i>K00692</i> | high-metabotype-associated | 0.00119267 | intermediate |
| <i>K05308</i> | Other                      | 0.0011947  | intermediate |
| <i>K01631</i> | Other                      | 0.00121357 | intermediate |
| <i>K01129</i> | high-metabotype-depleted   | 0.0012137  | intermediate |
| <i>K00765</i> | high-metabotype-depleted   | 0.00121835 | intermediate |
| <i>K02502</i> | Other                      | 0.00121835 | intermediate |
| <i>K00674</i> | high-metabotype-depleted   | 0.00121948 | intermediate |
| <i>K03079</i> | high-metabotype-depleted   | 0.00122248 | intermediate |
| <i>K03082</i> | high-metabotype-depleted   | 0.00122248 | intermediate |

|               |                            |            |              |
|---------------|----------------------------|------------|--------------|
| <i>K07550</i> | high-metabotype-associated | 0.00122665 | intermediate |
| <i>K12252</i> | high-metabotype-associated | 0.00122992 | intermediate |
| <i>K00767</i> | high-metabotype-depleted   | 0.00124839 | intermediate |
| <i>K01807</i> | high-metabotype-depleted   | 0.00124911 | intermediate |
| <i>K09474</i> | Other                      | 0.00126175 | intermediate |
| <i>K01078</i> | high-metabotype-depleted   | 0.00126175 | intermediate |
| <i>K01093</i> | Other                      | 0.00126175 | intermediate |
| <i>K03788</i> | Other                      | 0.00126175 | intermediate |
| <i>K03525</i> | high-metabotype-depleted   | 0.00126694 | intermediate |
| <i>K00867</i> | high-metabotype-depleted   | 0.00126694 | intermediate |
| <i>K09680</i> | Other                      | 0.00126694 | intermediate |
| <i>K01055</i> | high-metabotype-depleted   | 0.00128439 | intermediate |
| <i>K00527</i> | high-metabotype-depleted   | 0.00129247 | intermediate |
| <i>K01721</i> | Other                      | 0.00129537 | intermediate |
| <i>K00631</i> | high-metabotype-depleted   | 0.00130367 | intermediate |
| <i>K08591</i> | high-metabotype-depleted   | 0.00130367 | intermediate |
| <i>K03621</i> | high-metabotype-depleted   | 0.00130367 | intermediate |
| <i>K02227</i> | high-metabotype-depleted   | 0.00132488 | intermediate |
| <i>K01921</i> | high-metabotype-depleted   | 0.00132859 | intermediate |
| <i>K01032</i> | Other                      | 0.00133771 | intermediate |
| <i>K01031</i> | high-metabotype-enriched   | 0.00133771 | intermediate |
| <i>K03527</i> | high-metabotype-depleted   | 0.00133871 | intermediate |
| <i>K00117</i> | high-metabotype-associated | 0.00134421 | intermediate |
| <i>K03186</i> | high-metabotype-depleted   | 0.00134448 | intermediate |

|               |                            |            |              |
|---------------|----------------------------|------------|--------------|
| <i>K03182</i> | high-metabotype-depleted   | 0.00134448 | intermediate |
| <i>K01730</i> | high-metabotype-depleted   | 0.00134775 | intermediate |
| <i>K11180</i> | high-metabotype-depleted   | 0.00135842 | intermediate |
| <i>K11181</i> | Other                      | 0.00135842 | intermediate |
| <i>K01582</i> | high-metabotype-depleted   | 0.00136038 | intermediate |
| <i>K02614</i> | high-metabotype-depleted   | 0.00141688 | intermediate |
| <i>K00048</i> | high-metabotype-depleted   | 0.00142582 | intermediate |
| <i>K00480</i> | high-metabotype-associated | 0.00142638 | intermediate |
| <i>K01612</i> | high-metabotype-depleted   | 0.00142829 | intermediate |
| <i>K00825</i> | high-metabotype-depleted   | 0.0014338  | intermediate |
| <i>K00806</i> | high-metabotype-depleted   | 0.00143799 | intermediate |
| <i>K00539</i> | Other                      | 0.00144136 | intermediate |
| <i>K00848</i> | high-metabotype-depleted   | 0.0014476  | intermediate |
| <i>K11262</i> | Other                      | 0.00144951 | intermediate |
| <i>K00857</i> | high-metabotype-depleted   | 0.00145987 | intermediate |
| <i>K12743</i> | Other                      | 0.00146048 | intermediate |
| <i>K01735</i> | high-metabotype-depleted   | 0.00146744 | intermediate |
| <i>K11541</i> | high-metabotype-depleted   | 0.00148468 | intermediate |
| <i>K00560</i> | high-metabotype-depleted   | 0.00151634 | intermediate |
| <i>K00294</i> | high-metabotype-depleted   | 0.00152415 | intermediate |
| <i>K12304</i> | Other                      | 0.00153481 | intermediate |
| <i>K01190</i> | high-metabotype-depleted   | 0.00155197 | intermediate |
| <i>K00901</i> | high-metabotype-depleted   | 0.00155304 | intermediate |
| <i>K01428</i> | high-metabotype-depleted   | 0.00155489 | intermediate |

|               |                          |            |              |
|---------------|--------------------------|------------|--------------|
| <i>K01429</i> | high-metabotype-depleted | 0.00155489 | intermediate |
| <i>K14048</i> | Other                    | 0.00155489 | intermediate |
| <i>K01430</i> | Other                    | 0.00155489 | intermediate |
| <i>K01427</i> | Other                    | 0.00155489 | intermediate |
| <i>K03688</i> | high-metabotype-depleted | 0.00156672 | intermediate |
| <i>K00281</i> | high-metabotype-depleted | 0.00158514 | intermediate |
| <i>K00282</i> | high-metabotype-depleted | 0.00158514 | intermediate |
| <i>K00283</i> | high-metabotype-depleted | 0.00158514 | intermediate |
| <i>K00748</i> | high-metabotype-depleted | 0.00161117 | intermediate |
| <i>K00794</i> | high-metabotype-depleted | 0.00163598 | intermediate |
| <i>K01195</i> | high-metabotype-depleted | 0.00165541 | intermediate |
| <i>K01791</i> | high-metabotype-depleted | 0.0016575  | intermediate |
| <i>K01092</i> | high-metabotype-depleted | 0.00165789 | intermediate |
| <i>K00278</i> | high-metabotype-depleted | 0.00165849 | intermediate |
| <i>K03381</i> | high-metabotype-depleted | 0.0016606  | intermediate |
| <i>K00788</i> | high-metabotype-depleted | 0.00168415 | intermediate |
| <i>K00041</i> | high-metabotype-depleted | 0.00169203 | intermediate |
| <i>K00040</i> | Other                    | 0.00169203 | intermediate |
| <i>K03147</i> | high-metabotype-depleted | 0.0016946  | intermediate |
| <i>K01961</i> | high-metabotype-depleted | 0.00170183 | intermediate |
| <i>K02160</i> | high-metabotype-depleted | 0.00170183 | intermediate |
| <i>K01962</i> | high-metabotype-depleted | 0.00170183 | intermediate |
| <i>K01963</i> | high-metabotype-depleted | 0.00170183 | intermediate |



|               |                            |            |              |
|---------------|----------------------------|------------|--------------|
| <i>K00688</i> | high-metabotype-depleted   | 0.00170357 | intermediate |
| <i>K00888</i> | Other                      | 0.00170377 | intermediate |
| <i>K00009</i> | high-metabotype-depleted   | 0.00170553 | intermediate |
| <i>K00131</i> | high-metabotype-depleted   | 0.00170824 | intermediate |
| <i>K02079</i> | high-metabotype-depleted   | 0.00170869 | intermediate |
| <i>K01818</i> | high-metabotype-depleted   | 0.00170975 | intermediate |
| <i>K00939</i> | high-metabotype-depleted   | 0.00171222 | intermediate |
| <i>K01697</i> | Other                      | 0.00172198 | intermediate |
| <i>K00697</i> | high-metabotype-depleted   | 0.001728   | intermediate |
| <i>K08687</i> | high-metabotype-associated | 0.00173067 | intermediate |
| <i>K08094</i> | high-metabotype-depleted   | 0.0017331  | intermediate |
| <i>K02509</i> | Other                      | 0.00178265 | intermediate |
| <i>K01439</i> | high-metabotype-depleted   | 0.00178418 | intermediate |
| <i>K03416</i> | Other                      | 0.00179586 | intermediate |
| <i>K00055</i> | Other                      | 0.00179859 | intermediate |
| <i>K01918</i> | high-metabotype-depleted   | 0.00180611 | intermediate |
| <i>K08682</i> | high-metabotype-depleted   | 0.00180857 | intermediate |
| <i>K14154</i> | high-metabotype-associated | 0.00181452 | intermediate |
| <i>K00847</i> | high-metabotype-depleted   | 0.00182242 | intermediate |
| <i>K09251</i> | high-metabotype-depleted   | 0.00183149 | intermediate |
| <i>K12256</i> | Other                      | 0.00183149 | intermediate |
| <i>K00880</i> | high-metabotype-depleted   | 0.00183822 | intermediate |
| <i>K02858</i> | high-metabotype-depleted   | 0.00185841 | intermediate |
| <i>K12409</i> | Other                      | 0.00187821 | intermediate |
| <i>K00190</i> | Other                      | 0.00188076 | intermediate |

|               |                            |            |              |
|---------------|----------------------------|------------|--------------|
| <i>K01839</i> | high-metabotype-depleted   | 0.0018825  | intermediate |
| <i>K01178</i> | Other                      | 0.00189003 | intermediate |
| <i>K03338</i> | high-metabotype-depleted   | 0.00190336 | intermediate |
| <i>K01815</i> | high-metabotype-depleted   | 0.00191432 | intermediate |
| <i>K08302</i> | high-metabotype-depleted   | 0.00194433 | intermediate |
| <i>K01635</i> | Other                      | 0.00194433 | intermediate |
| <i>K00394</i> | high-metabotype-depleted   | 0.00195735 | intermediate |
| <i>K00395</i> | Other                      | 0.00195735 | intermediate |
| <i>K00754</i> | high-metabotype-depleted   | 0.00200128 | intermediate |
| <i>K01218</i> | high-metabotype-depleted   | 0.00200199 | intermediate |
| <i>K01485</i> | high-metabotype-depleted   | 0.00200542 | intermediate |
| <i>K00855</i> | high-metabotype-associated | 0.00200688 | intermediate |
| <i>K00390</i> | high-metabotype-depleted   | 0.00202102 | intermediate |
| <i>K01512</i> | high-metabotype-depleted   | 0.00202319 | intermediate |
| <i>K01270</i> | high-metabotype-depleted   | 0.00203213 | intermediate |
| <i>K01256</i> | high-metabotype-depleted   | 0.00203213 | intermediate |
| <i>K01255</i> | high-metabotype-depleted   | 0.00203213 | intermediate |
| <i>K07751</i> | high-metabotype-associated | 0.00203213 | intermediate |
| <i>K11140</i> | Other                      | 0.00203213 | intermediate |
| <i>K01068</i> | Other                      | 0.00206963 | intermediate |
| <i>K12506</i> | high-metabotype-depleted   | 0.00207224 | intermediate |
| <i>K00677</i> | high-metabotype-depleted   | 0.00208591 | intermediate |
| <i>K00446</i> | high-metabotype-associated | 0.00209512 | intermediate |
| <i>K01194</i> | Other                      | 0.0020994  | intermediate |
| <i>K09023</i> | Other                      | 0.00211616 | intermediate |

|               |                            |            |              |
|---------------|----------------------------|------------|--------------|
| <i>K00517</i> | high-metabotype-associated | 0.00211962 | intermediate |
| <i>K01714</i> | high-metabotype-depleted   | 0.00220089 | intermediate |
| <i>K00164</i> | high-metabotype-depleted   | 0.00220097 | intermediate |
| <i>K00758</i> | high-metabotype-depleted   | 0.00220741 | intermediate |
| <i>K00823</i> | Other                      | 0.00222097 | intermediate |
| <i>K03150</i> | high-metabotype-depleted   | 0.00222557 | intermediate |
| <i>K01621</i> | high-metabotype-depleted   | 0.00224343 | intermediate |
| <i>K00579</i> | high-metabotype-depleted   | 0.00225199 | intermediate |
| <i>K00577</i> | Other                      | 0.00225199 | intermediate |
| <i>K00580</i> | Other                      | 0.00225199 | intermediate |
| <i>K00578</i> | high-metabotype-associated | 0.00225199 | intermediate |
| <i>K00582</i> | high-metabotype-associated | 0.00225199 | intermediate |
| <i>K00581</i> | high-metabotype-associated | 0.00225199 | intermediate |
| <i>K00584</i> | high-metabotype-associated | 0.00225199 | intermediate |
| <i>K00583</i> | Other                      | 0.00225199 | intermediate |
| <i>K00284</i> | high-metabotype-depleted   | 0.00226932 | intermediate |
| <i>K00840</i> | high-metabotype-depleted   | 0.00226982 | intermediate |
| <i>K00673</i> | high-metabotype-depleted   | 0.00226988 | intermediate |
| <i>K06447</i> | high-metabotype-depleted   | 0.00227052 | intermediate |
| <i>K01484</i> | Other                      | 0.00227058 | intermediate |
| <i>K03896</i> | high-metabotype-depleted   | 0.00227122 | intermediate |
| <i>K06920</i> | high-metabotype-depleted   | 0.00227122 | intermediate |
| <i>K00721</i> | high-metabotype-depleted   | 0.00227122 | intermediate |
| <i>K01710</i> | high-metabotype-depleted   | 0.00227122 | intermediate |

|               |                            |            |              |
|---------------|----------------------------|------------|--------------|
| <i>K02291</i> | high-metabotype-depleted   | 0.00227122 | intermediate |
| <i>K07536</i> | high-metabotype-depleted   | 0.00227122 | intermediate |
| <i>K00979</i> | high-metabotype-depleted   | 0.00227122 | intermediate |
| <i>K02549</i> | high-metabotype-depleted   | 0.00227122 | intermediate |
| <i>K05526</i> | high-metabotype-depleted   | 0.00227122 | intermediate |
| <i>K01709</i> | high-metabotype-depleted   | 0.00227122 | intermediate |
| <i>K01772</i> | Other                      | 0.00227122 | intermediate |
| <i>K10011</i> | Other                      | 0.00227193 | intermediate |
| <i>K00436</i> | high-metabotype-depleted   | 0.00227404 | intermediate |
| <i>K00879</i> | high-metabotype-depleted   | 0.00227826 | intermediate |
| <i>K14153</i> | high-metabotype-depleted   | 0.00227991 | intermediate |
| <i>K06162</i> | high-metabotype-depleted   | 0.00228107 | intermediate |
| <i>K00260</i> | high-metabotype-depleted   | 0.00229578 | intermediate |
| <i>K00262</i> | high-metabotype-depleted   | 0.00229578 | intermediate |
| <i>K00261</i> | Other                      | 0.00229578 | intermediate |
| <i>K11540</i> | high-metabotype-depleted   | 0.00229731 | intermediate |
| <i>K03517</i> | high-metabotype-depleted   | 0.00230761 | intermediate |
| <i>K05714</i> | Other                      | 0.00232438 | intermediate |
| <i>K01007</i> | high-metabotype-depleted   | 0.00232532 | intermediate |
| <i>K01006</i> | high-metabotype-depleted   | 0.00232532 | intermediate |
| <i>K03342</i> | high-metabotype-associated | 0.00237473 | intermediate |
| <i>K01808</i> | high-metabotype-depleted   | 0.00238543 | intermediate |
| <i>K01925</i> | high-metabotype-depleted   | 0.0023887  | intermediate |

|               |                            |            |              |
|---------------|----------------------------|------------|--------------|
| <i>K01668</i> | high-metabotype-depleted   | 0.00239651 | intermediate |
| <i>K01690</i> | Other                      | 0.0024007  | intermediate |
| <i>K01637</i> | high-metabotype-associated | 0.00241241 | intermediate |
| <i>K01243</i> | high-metabotype-depleted   | 0.00242435 | intermediate |
| <i>K01920</i> | high-metabotype-depleted   | 0.00244254 | intermediate |
| <i>K00001</i> | high-metabotype-depleted   | 0.00244978 | intermediate |
| <i>K13953</i> | high-metabotype-depleted   | 0.00244978 | intermediate |
| <i>K11754</i> | high-metabotype-depleted   | 0.00247073 | intermediate |
| <i>K01930</i> | Other                      | 0.00247073 | intermediate |
| <i>K01476</i> | high-metabotype-depleted   | 0.00247768 | intermediate |
| <i>K00156</i> | high-metabotype-depleted   | 0.00248673 | intermediate |
| <i>K00177</i> | high-metabotype-depleted   | 0.00248919 | intermediate |
| <i>K00176</i> | high-metabotype-depleted   | 0.00248919 | intermediate |
| <i>K00175</i> | high-metabotype-depleted   | 0.00248919 | intermediate |
| <i>K00174</i> | high-metabotype-depleted   | 0.00248919 | intermediate |
| <i>K00845</i> | high-metabotype-depleted   | 0.00252348 | intermediate |
| <i>K00853</i> | high-metabotype-depleted   | 0.00254621 | intermediate |
| <i>K03272</i> | high-metabotype-depleted   | 0.00255583 | intermediate |
| <i>K00796</i> | high-metabotype-depleted   | 0.0025569  | intermediate |
| <i>K13941</i> | high-metabotype-depleted   | 0.0025569  | intermediate |
| <i>K00766</i> | high-metabotype-depleted   | 0.00256841 | intermediate |
| <i>K00759</i> | high-metabotype-depleted   | 0.002577   | intermediate |
| <i>K00912</i> | high-metabotype-depleted   | 0.00259583 | intermediate |

|               |                          |            |              |
|---------------|--------------------------|------------|--------------|
| <i>K00481</i> | Other                    | 0.00259767 | intermediate |
| <i>K00654</i> | Other                    | 0.00260103 | intermediate |
| <i>K00265</i> | high-metabotype-depleted | 0.00260349 | intermediate |
| <i>K00266</i> | high-metabotype-depleted | 0.00260349 | intermediate |
| <i>K00264</i> | high-metabotype-depleted | 0.00260349 | intermediate |
| <i>K01630</i> | Other                    | 0.0026041  | intermediate |
| <i>K01572</i> | high-metabotype-depleted | 0.00260486 | intermediate |
| <i>K01571</i> | high-metabotype-depleted | 0.00260486 | intermediate |
| <i>K01573</i> | high-metabotype-depleted | 0.00260486 | intermediate |
| <i>K00864</i> | high-metabotype-depleted | 0.00260844 | intermediate |
| <i>K01633</i> | high-metabotype-depleted | 0.00262567 | intermediate |
| <i>K13940</i> | high-metabotype-depleted | 0.00262567 | intermediate |
| <i>K01213</i> | high-metabotype-depleted | 0.00262777 | intermediate |
| <i>K00010</i> | high-metabotype-depleted | 0.00263066 | intermediate |
| <i>K01647</i> | high-metabotype-depleted | 0.00264205 | intermediate |
| <i>K01646</i> | high-metabotype-depleted | 0.00264205 | intermediate |
| <i>K01643</i> | high-metabotype-depleted | 0.00264205 | intermediate |
| <i>K01644</i> | high-metabotype-depleted | 0.00264205 | intermediate |
| <i>K02361</i> | high-metabotype-depleted | 0.00264505 | intermediate |
| <i>K02552</i> | Other                    | 0.00264505 | intermediate |
| <i>K00366</i> | high-metabotype-depleted | 0.00267454 | intermediate |
| <i>K00363</i> | high-metabotype-depleted | 0.00267454 | intermediate |
| <i>K03385</i> | high-metabotype-depleted | 0.00267454 | intermediate |
| <i>K00362</i> | Other                    | 0.00267454 | intermediate |

|               |                            |            |              |
|---------------|----------------------------|------------|--------------|
| <i>K11258</i> | high-metabotype-depleted   | 0.00267856 | intermediate |
| <i>K01653</i> | high-metabotype-depleted   | 0.00267856 | intermediate |
| <i>K01652</i> | high-metabotype-depleted   | 0.00267856 | intermediate |
| <i>K01139</i> | Other                      | 0.00268171 | intermediate |
| <i>K00033</i> | high-metabotype-depleted   | 0.00268686 | intermediate |
| <i>K07514</i> | Other                      | 0.0027072  | intermediate |
| <i>K03331</i> | high-metabotype-enriched   | 0.00273098 | intermediate |
| <i>K00455</i> | high-metabotype-associated | 0.00275136 | intermediate |
| <i>K01686</i> | high-metabotype-depleted   | 0.0027539  | intermediate |
| <i>K01685</i> | high-metabotype-depleted   | 0.0027539  | intermediate |
| <i>K01586</i> | high-metabotype-depleted   | 0.00275435 | intermediate |
| <i>K00690</i> | high-metabotype-depleted   | 0.00275591 | intermediate |
| <i>K01755</i> | high-metabotype-depleted   | 0.00275836 | intermediate |
| <i>K01758</i> | high-metabotype-depleted   | 0.00275934 | intermediate |
| <i>K00680</i> | high-metabotype-depleted   | 0.00276516 | intermediate |
| <i>K01137</i> | high-metabotype-depleted   | 0.0027653  | intermediate |
| <i>K00148</i> | Other                      | 0.0027828  | intermediate |
| <i>K13829</i> | high-metabotype-associated | 0.0028373  | intermediate |
| <i>K13015</i> | high-metabotype-depleted   | 0.00284255 | intermediate |
| <i>K01628</i> | high-metabotype-depleted   | 0.00284606 | intermediate |
| <i>K06163</i> | Other                      | 0.00284958 | intermediate |
| <i>K00797</i> | high-metabotype-depleted   | 0.00285764 | intermediate |
| <i>K01579</i> | high-metabotype-depleted   | 0.00286242 | intermediate |

|               |                          |            |              |
|---------------|--------------------------|------------|--------------|
| <i>K00761</i> | high-metabotype-depleted | 0.00289069 | intermediate |
| <i>K02825</i> | high-metabotype-depleted | 0.00289069 | intermediate |
| <i>K01938</i> | high-metabotype-depleted | 0.00289696 | intermediate |
| <i>K01054</i> | high-metabotype-depleted | 0.00291339 | central      |
| <i>K02203</i> | Other                    | 0.00291491 | central      |
| <i>K00702</i> | high-metabotype-depleted | 0.00294627 | central      |
| <i>K03149</i> | high-metabotype-depleted | 0.0029474  | central      |
| <i>K01948</i> | high-metabotype-depleted | 0.0029544  | central      |
| <i>K00926</i> | high-metabotype-depleted | 0.0029544  | central      |
| <i>K00966</i> | high-metabotype-depleted | 0.00296627 | central      |
| <i>K00971</i> | high-metabotype-depleted | 0.00296627 | central      |
| <i>K00384</i> | high-metabotype-depleted | 0.00297349 | central      |
| <i>K03474</i> | high-metabotype-depleted | 0.00298405 | central      |
| <i>K01777</i> | high-metabotype-depleted | 0.00298415 | central      |
| <i>K13830</i> | Other                    | 0.00303206 | central      |
| <i>K00036</i> | high-metabotype-depleted | 0.00303936 | central      |
| <i>K00065</i> | high-metabotype-depleted | 0.00304677 | central      |
| <i>K05939</i> | high-metabotype-depleted | 0.00305725 | central      |
| <i>K14578</i> | Other                    | 0.00306217 | central      |
| <i>K09473</i> | Other                    | 0.00306353 | central      |
| <i>K01555</i> | high-metabotype-depleted | 0.00306403 | central      |
| <i>K03465</i> | high-metabotype-depleted | 0.00309597 | central      |
| <i>K01929</i> | high-metabotype-depleted | 0.0031022  | central      |



|               |                            |            |         |
|---------------|----------------------------|------------|---------|
| <i>K01895</i> | high-metabotype-depleted   | 0.00312564 | central |
| <i>K01905</i> | high-metabotype-associated | 0.00312564 | central |
| <i>K04781</i> | high-metabotype-associated | 0.00312579 | central |
| <i>K00274</i> | high-metabotype-depleted   | 0.00320178 | central |
| <i>K14152</i> | high-metabotype-associated | 0.00321247 | central |
| <i>K03783</i> | high-metabotype-depleted   | 0.00321895 | central |
| <i>K03784</i> | high-metabotype-depleted   | 0.00321895 | central |
| <i>K05306</i> | Other                      | 0.00322054 | central |
| <i>K01196</i> | Other                      | 0.00322387 | central |
| <i>K01066</i> | high-metabotype-depleted   | 0.00326518 | central |
| <i>K01251</i> | high-metabotype-depleted   | 0.003285   | central |
| <i>K09011</i> | high-metabotype-depleted   | 0.00333266 | central |
| <i>K02523</i> | high-metabotype-depleted   | 0.00334012 | central |
| <i>K03524</i> | high-metabotype-depleted   | 0.00336309 | central |
| <i>K03851</i> | high-metabotype-associated | 0.00338408 | central |
| <i>K00230</i> | high-metabotype-depleted   | 0.00339629 | central |
| <i>K00231</i> | Other                      | 0.00339629 | central |
| <i>K00276</i> | Other                      | 0.00340397 | central |
| <i>K01739</i> | Other                      | 0.00340426 | central |
| <i>K00973</i> | high-metabotype-depleted   | 0.00340473 | central |
| <i>K01497</i> | high-metabotype-depleted   | 0.00340473 | central |
| <i>K10026</i> | high-metabotype-depleted   | 0.00340473 | central |
| <i>K02224</i> | high-metabotype-depleted   | 0.00340473 | central |
| <i>K08680</i> | high-metabotype-depleted   | 0.00340473 | central |

|               |                            |            |         |
|---------------|----------------------------|------------|---------|
| <i>K00978</i> | Other                      | 0.00340473 | central |
| <i>K03897</i> | Other                      | 0.00340473 | central |
| <i>K06167</i> | high-metabotype-depleted   | 0.00341738 | central |
| <i>K01640</i> | high-metabotype-depleted   | 0.0034266  | central |
| <i>K01193</i> | high-metabotype-depleted   | 0.00347429 | central |
| <i>K00822</i> | high-metabotype-depleted   | 0.00348743 | central |
| <i>K11717</i> | high-metabotype-depleted   | 0.00350754 | central |
| <i>K00029</i> | high-metabotype-depleted   | 0.00350801 | central |
| <i>K00028</i> | Other                      | 0.00350801 | central |
| <i>K10218</i> | Other                      | 0.00354819 | central |
| <i>K08660</i> | high-metabotype-depleted   | 0.00355634 | central |
| <i>K00832</i> | high-metabotype-depleted   | 0.00356943 | central |
| <i>K00681</i> | high-metabotype-depleted   | 0.00362737 | central |
| <i>K00795</i> | high-metabotype-depleted   | 0.00367338 | central |
| <i>K01655</i> | high-metabotype-depleted   | 0.0036742  | central |
| <i>K01026</i> | high-metabotype-depleted   | 0.00369603 | central |
| <i>K00764</i> | high-metabotype-depleted   | 0.00370256 | central |
| <i>K01061</i> | high-metabotype-depleted   | 0.00374045 | central |
| <i>K01939</i> | high-metabotype-depleted   | 0.00375783 | central |
| <i>K00492</i> | high-metabotype-associated | 0.00378824 | central |
| <i>K00648</i> | high-metabotype-depleted   | 0.00381001 | central |
| <i>K02437</i> | high-metabotype-depleted   | 0.00381526 | central |
| <i>K00288</i> | high-metabotype-depleted   | 0.0038256  | central |

|               |                            |            |         |
|---------------|----------------------------|------------|---------|
| <i>K01077</i> | high-metabotype-depleted   | 0.00385906 | central |
| <i>K01113</i> | high-metabotype-depleted   | 0.00385906 | central |
| <i>K01782</i> | Other                      | 0.00388978 | central |
| <i>K01825</i> | high-metabotype-associated | 0.00388978 | central |
| <i>K01812</i> | high-metabotype-depleted   | 0.00390952 | central |
| <i>K00627</i> | high-metabotype-depleted   | 0.00392784 | central |
| <i>K12524</i> | high-metabotype-depleted   | 0.00395109 | central |
| <i>K12525</i> | Other                      | 0.00395109 | central |
| <i>K05774</i> | high-metabotype-depleted   | 0.00398449 | central |
| <i>K05344</i> | high-metabotype-depleted   | 0.00399779 | central |
| <i>K01085</i> | Other                      | 0.00399779 | central |
| <i>K01649</i> | high-metabotype-depleted   | 0.00402178 | central |
| <i>K01426</i> | high-metabotype-depleted   | 0.00402539 | central |
| <i>K11121</i> | Other                      | 0.00408033 | central |
| <i>K00155</i> | high-metabotype-depleted   | 0.00409535 | central |
| <i>K01915</i> | high-metabotype-depleted   | 0.00416016 | central |
| <i>K00605</i> | high-metabotype-depleted   | 0.00416241 | central |
| <i>K00942</i> | high-metabotype-depleted   | 0.00417481 | central |
| <i>K13998</i> | Other                      | 0.00417602 | central |
| <i>K01629</i> | high-metabotype-depleted   | 0.00426003 | central |
| <i>K00940</i> | high-metabotype-depleted   | 0.00427271 | central |
| <i>K02564</i> | high-metabotype-depleted   | 0.00429296 | central |
| <i>K00817</i> | high-metabotype-depleted   | 0.00430096 | central |
| <i>K01738</i> | high-metabotype-depleted   | 0.00440359 | central |

|               |                            |            |         |
|---------------|----------------------------|------------|---------|
| <i>K12339</i> | high-metabotype-depleted   | 0.00440359 | central |
| <i>K01809</i> | high-metabotype-depleted   | 0.00448319 | central |
| <i>K02495</i> | high-metabotype-depleted   | 0.00452276 | central |
| <i>K00228</i> | Other                      | 0.00452276 | central |
| <i>K02551</i> | high-metabotype-depleted   | 0.00453682 | central |
| <i>K01737</i> | high-metabotype-depleted   | 0.00453682 | central |
| <i>K06042</i> | high-metabotype-depleted   | 0.00453752 | central |
| <i>K03271</i> | high-metabotype-depleted   | 0.00453788 | central |
| <i>K02080</i> | high-metabotype-depleted   | 0.0045537  | central |
| <i>K01058</i> | high-metabotype-depleted   | 0.00455914 | central |
| <i>K00103</i> | high-metabotype-associated | 0.00458637 | central |
| <i>K03519</i> | high-metabotype-depleted   | 0.00464875 | central |
| <i>K03518</i> | high-metabotype-depleted   | 0.00464875 | central |
| <i>K03520</i> | high-metabotype-depleted   | 0.00464875 | central |
| <i>K00198</i> | high-metabotype-depleted   | 0.00464875 | central |
| <i>K00196</i> | Other                      | 0.00464875 | central |
| <i>K14187</i> | high-metabotype-depleted   | 0.00467073 | central |
| <i>K00099</i> | high-metabotype-depleted   | 0.00469363 | central |
| <i>K03384</i> | high-metabotype-associated | 0.00474347 | central |
| <i>K00548</i> | high-metabotype-depleted   | 0.00476349 | central |
| <i>K01787</i> | high-metabotype-depleted   | 0.00478787 | central |
| <i>K00963</i> | high-metabotype-depleted   | 0.00480817 | central |
| <i>K01912</i> | high-metabotype-depleted   | 0.00481492 | central |

|               |                          |            |         |
|---------------|--------------------------|------------|---------|
| <i>K01744</i> | high-metabotype-depleted | 0.00483924 | central |
| <i>K00859</i> | high-metabotype-depleted | 0.00494455 | central |
| <i>K10977</i> | high-metabotype-enriched | 0.00499419 | central |
| <i>K02777</i> | high-metabotype-depleted | 0.00500503 | central |
| <i>K09470</i> | Other                    | 0.00509778 | central |
| <i>K02231</i> | high-metabotype-depleted | 0.00510287 | central |
| <i>K14155</i> | high-metabotype-depleted | 0.00513218 | central |
| <i>K01760</i> | high-metabotype-depleted | 0.00513218 | central |
| <i>K01425</i> | high-metabotype-depleted | 0.00518353 | central |
| <i>K02510</i> | high-metabotype-depleted | 0.00523287 | central |
| <i>K01114</i> | high-metabotype-depleted | 0.00524658 | central |
| <i>K01638</i> | Other                    | 0.005276   | central |
| <i>K12972</i> | Other                    | 0.0052856  | central |
| <i>K00049</i> | Other                    | 0.0052856  | central |
| <i>K13789</i> | high-metabotype-depleted | 0.00537469 | central |
| <i>K13787</i> | Other                    | 0.00537469 | central |
| <i>K01495</i> | high-metabotype-depleted | 0.00541199 | central |
| <i>K09007</i> | high-metabotype-depleted | 0.00541199 | central |
| <i>K00965</i> | high-metabotype-depleted | 0.00541754 | central |
| <i>K09698</i> | high-metabotype-depleted | 0.00543149 | central |
| <i>K04021</i> | high-metabotype-depleted | 0.00550746 | central |
| <i>K05368</i> | high-metabotype-depleted | 0.00564712 | central |
| <i>K00299</i> | Other                    | 0.00564712 | central |
| <i>K00595</i> | high-metabotype-depleted | 0.00566048 | central |

|               |                          |            |         |
|---------------|--------------------------|------------|---------|
| <i>K00012</i> | high-metabotype-depleted | 0.00566751 | central |
| <i>K00652</i> | high-metabotype-depleted | 0.00569649 | central |
| <i>K03183</i> | high-metabotype-depleted | 0.00579238 | central |
| <i>K13519</i> | Other                    | 0.00580075 | central |
| <i>K00249</i> | high-metabotype-depleted | 0.00581037 | central |
| <i>K14450</i> | Other                    | 0.00584263 | central |
| <i>K00141</i> | Other                    | 0.00592903 | central |
| <i>K03738</i> | high-metabotype-depleted | 0.00593055 | central |
| <i>K01595</i> | high-metabotype-depleted | 0.00604355 | central |
| <i>K01062</i> | high-metabotype-depleted | 0.00607347 | central |
| <i>K00383</i> | high-metabotype-depleted | 0.00610751 | central |
| <i>K01752</i> | high-metabotype-depleted | 0.00611188 | central |
| <i>K14170</i> | high-metabotype-depleted | 0.00614716 | central |
| <i>K07250</i> | high-metabotype-depleted | 0.00615098 | central |
| <i>K01081</i> | high-metabotype-depleted | 0.0061697  | central |
| <i>K08722</i> | high-metabotype-depleted | 0.0061697  | central |
| <i>K03787</i> | high-metabotype-depleted | 0.0061697  | central |
| <i>K08723</i> | high-metabotype-depleted | 0.0061697  | central |
| <i>K11751</i> | Other                    | 0.0061697  | central |
| <i>K01483</i> | high-metabotype-depleted | 0.00624922 | central |
| <i>K03737</i> | high-metabotype-depleted | 0.00629242 | central |
| <i>K01501</i> | high-metabotype-depleted | 0.00637599 | central |
| <i>K00162</i> | high-metabotype-depleted | 0.0063804  | central |

|               |                            |            |         |
|---------------|----------------------------|------------|---------|
| <i>K00161</i> | high-metabotype-depleted   | 0.0063804  | central |
| <i>K00163</i> | high-metabotype-depleted   | 0.0063804  | central |
| <i>K00760</i> | high-metabotype-depleted   | 0.00643837 | central |
| <i>K00273</i> | Other                      | 0.00646929 | central |
| <i>K00613</i> | high-metabotype-depleted   | 0.00649727 | central |
| <i>K00821</i> | high-metabotype-depleted   | 0.00655291 | central |
| <i>K03856</i> | high-metabotype-depleted   | 0.00675233 | central |
| <i>K01626</i> | high-metabotype-depleted   | 0.00675233 | central |
| <i>K02318</i> | Other                      | 0.00676442 | central |
| <i>K02233</i> | high-metabotype-depleted   | 0.00679996 | central |
| <i>K11753</i> | high-metabotype-depleted   | 0.00682708 | central |
| <i>K00320</i> | high-metabotype-associated | 0.0068471  | central |
| <i>K02548</i> | high-metabotype-depleted   | 0.00691592 | central |
| <i>K00068</i> | high-metabotype-depleted   | 0.0069177  | central |
| <i>K00132</i> | high-metabotype-depleted   | 0.00693557 | central |
| <i>K04073</i> | Other                      | 0.00693557 | central |
| <i>K00948</i> | high-metabotype-depleted   | 0.00704215 | central |
| <i>K03339</i> | Other                      | 0.00704924 | central |
| <i>K01046</i> | high-metabotype-depleted   | 0.0071999  | central |
| <i>K02563</i> | high-metabotype-depleted   | 0.00722883 | central |
| <i>K00998</i> | high-metabotype-depleted   | 0.0072623  | central |
| <i>K00918</i> | Other                      | 0.00731371 | central |
| <i>K01593</i> | high-metabotype-enriched   | 0.00734986 | central |
| <i>K00946</i> | high-metabotype-depleted   | 0.00737503 | central |

|               |                          |            |         |
|---------------|--------------------------|------------|---------|
| <i>K00031</i> | high-metabotype-depleted | 0.00737758 | central |
| <i>K00603</i> | high-metabotype-depleted | 0.00740237 | central |
| <i>K13821</i> | Other                    | 0.00741901 | central |
| <i>K01756</i> | high-metabotype-depleted | 0.00746128 | central |
| <i>K02527</i> | high-metabotype-depleted | 0.00759936 | central |
| <i>K01443</i> | high-metabotype-depleted | 0.00760708 | central |
| <i>K00850</i> | high-metabotype-depleted | 0.00770122 | central |
| <i>K12309</i> | Other                    | 0.00779262 | central |
| <i>K13990</i> | high-metabotype-depleted | 0.00779717 | central |
| <i>K13421</i> | Other                    | 0.00780277 | central |
| <i>K01641</i> | Other                    | 0.00787449 | central |
| <i>K01623</i> | high-metabotype-depleted | 0.00789328 | central |
| <i>K02226</i> | high-metabotype-depleted | 0.00792608 | central |
| <i>K00626</i> | high-metabotype-depleted | 0.00792885 | central |
| <i>K01601</i> | high-metabotype-depleted | 0.00803579 | central |
| <i>K02372</i> | high-metabotype-depleted | 0.00805742 | central |
| <i>K00169</i> | high-metabotype-depleted | 0.00812372 | central |
| <i>K00170</i> | high-metabotype-depleted | 0.00812372 | central |
| <i>K00172</i> | high-metabotype-depleted | 0.00812372 | central |
| <i>K00171</i> | high-metabotype-depleted | 0.00812372 | central |
| <i>K01840</i> | high-metabotype-depleted | 0.00817984 | central |
| <i>K01719</i> | high-metabotype-depleted | 0.00823702 | central |
| <i>K11787</i> | high-metabotype-depleted | 0.00823743 | central |



|               |                            |            |         |
|---------------|----------------------------|------------|---------|
| <i>K00616</i> | high-metabotype-depleted   | 0.00840804 | central |
| <i>K13497</i> | Other                      | 0.00858134 | central |
| <i>K01624</i> | high-metabotype-depleted   | 0.00872603 | central |
| <i>K11645</i> | Other                      | 0.00872603 | central |
| <i>K07407</i> | high-metabotype-depleted   | 0.00878416 | central |
| <i>K07406</i> | high-metabotype-depleted   | 0.00878416 | central |
| <i>K01189</i> | Other                      | 0.00878416 | central |
| <i>K05597</i> | Other                      | 0.00896878 | central |
| <i>K13831</i> | Other                      | 0.00897011 | central |
| <i>K02517</i> | high-metabotype-depleted   | 0.00900541 | central |
| <i>K00140</i> | high-metabotype-depleted   | 0.00900657 | central |
| <i>K05895</i> | Other                      | 0.00905185 | central |
| <i>K00768</i> | high-metabotype-depleted   | 0.00905255 | central |
| <i>K02428</i> | high-metabotype-depleted   | 0.00963308 | central |
| <i>K01754</i> | high-metabotype-depleted   | 0.00974366 | central |
| <i>K00121</i> | high-metabotype-depleted   | 0.00992738 | central |
| <i>K13038</i> | high-metabotype-depleted   | 0.00993105 | central |
| <i>K02188</i> | high-metabotype-depleted   | 0.01017621 | central |
| <i>K04719</i> | Other                      | 0.01017761 | central |
| <i>K12373</i> | high-metabotype-depleted   | 0.01046929 | central |
| <i>K14157</i> | Other                      | 0.01062354 | central |
| <i>K01000</i> | high-metabotype-depleted   | 0.01065265 | central |
| <i>K01580</i> | high-metabotype-depleted   | 0.01079419 | central |
| <i>K03181</i> | Other                      | 0.01082856 | central |
| <i>K13812</i> | high-metabotype-associated | 0.010849   | central |
| <i>K14138</i> | high-metabotype-depleted   | 0.01111507 | central |

|               |                            |            |         |
|---------------|----------------------------|------------|---------|
| <i>K00814</i> | Other                      | 0.01115534 | central |
| <i>K01599</i> | high-metabotype-depleted   | 0.01129986 | central |
| <i>K01557</i> | Other                      | 0.0113538  | central |
| <i>K00824</i> | high-metabotype-depleted   | 0.01136646 | central |
| <i>K07508</i> | Other                      | 0.01180782 | central |
| <i>K13541</i> | high-metabotype-depleted   | 0.01185361 | central |
| <i>K01053</i> | high-metabotype-associated | 0.01199475 | central |
| <i>K00812</i> | high-metabotype-depleted   | 0.01203587 | central |
| <i>K00811</i> | high-metabotype-depleted   | 0.01203587 | central |
| <i>K14454</i> | high-metabotype-depleted   | 0.01203587 | central |
| <i>K00813</i> | high-metabotype-depleted   | 0.01203587 | central |
| <i>K11358</i> | high-metabotype-depleted   | 0.01203587 | central |
| <i>K14455</i> | Other                      | 0.01203587 | central |
| <i>K00620</i> | high-metabotype-depleted   | 0.01206227 | central |
| <i>K00874</i> | high-metabotype-depleted   | 0.01210147 | central |
| <i>K04042</i> | high-metabotype-depleted   | 0.01234616 | central |
| <i>K01835</i> | high-metabotype-depleted   | 0.01240474 | central |
| <i>K00197</i> | high-metabotype-depleted   | 0.01253785 | central |
| <i>K00194</i> | high-metabotype-depleted   | 0.01253785 | central |
| <i>K07248</i> | Other                      | 0.01262279 | central |
| <i>K01011</i> | high-metabotype-depleted   | 0.01294532 | central |
| <i>K00602</i> | high-metabotype-depleted   | 0.01296137 | central |
| <i>K01492</i> | high-metabotype-depleted   | 0.01296137 | central |
| <i>K04072</i> | high-metabotype-depleted   | 0.01319138 | central |

|               |                            |            |         |
|---------------|----------------------------|------------|---------|
| <i>K03431</i> | high-metabotype-depleted   | 0.01321643 | central |
| <i>K03179</i> | high-metabotype-depleted   | 0.01363899 | central |
| <i>K00100</i> | high-metabotype-depleted   | 0.01404164 | central |
| <i>K05710</i> | Other                      | 0.01408908 | central |
| <i>K00529</i> | high-metabotype-depleted   | 0.01522539 | central |
| <i>K13540</i> | high-metabotype-depleted   | 0.01622673 | central |
| <i>K00149</i> | Other                      | 0.016745   | central |
| <i>K00656</i> | high-metabotype-depleted   | 0.01709293 | central |
| <i>K00129</i> | high-metabotype-depleted   | 0.01781928 | central |
| <i>K11533</i> | Other                      | 0.01813591 | central |
| <i>K00665</i> | Other                      | 0.01821316 | central |
| <i>K14260</i> | high-metabotype-depleted   | 0.01847745 | central |
| <i>K00600</i> | high-metabotype-depleted   | 0.01954724 | central |
| <i>K00632</i> | high-metabotype-depleted   | 0.02018719 | central |
| <i>K00820</i> | high-metabotype-depleted   | 0.02096003 | central |
| <i>K01666</i> | high-metabotype-depleted   | 0.02116003 | central |
| <i>K13799</i> | high-metabotype-associated | 0.02174299 | central |
| <i>K00615</i> | high-metabotype-depleted   | 0.02201963 | central |
| <i>K01622</i> | high-metabotype-depleted   | 0.02239779 | central |
| <i>K10760</i> | Other                      | 0.02451667 | central |
| <i>K13810</i> | Other                      | 0.02682393 | central |
| <i>K00382</i> | high-metabotype-depleted   | 0.02709466 | central |
| <i>K13542</i> | high-metabotype-depleted   | 0.02853149 | central |
| <i>K13853</i> | Other                      | 0.02984132 | central |
| <i>K00830</i> | Other                      | 0.03058833 | central |

|               |                            |            |         |
|---------------|----------------------------|------------|---------|
| <i>K00002</i> | high-metabotype-depleted   | 0.03225697 | central |
| <i>K00844</i> | high-metabotype-depleted   | 0.03388589 | central |
| <i>K01662</i> | high-metabotype-depleted   | 0.03431382 | central |
| <i>K00128</i> | high-metabotype-depleted   | 0.03761891 | central |
| <i>K14085</i> | Other                      | 0.03791198 | central |
| <i>K01749</i> | high-metabotype-depleted   | 0.03893425 | central |
| <i>K01698</i> | high-metabotype-depleted   | 0.04002135 | central |
| <i>K00643</i> | high-metabotype-associated | 0.04195093 | central |
| <i>K01513</i> | high-metabotype-depleted   | 0.0427719  | central |
| <i>K01625</i> | high-metabotype-depleted   | 0.04960732 | central |
| <i>K00011</i> | Other                      | 0.05170442 | central |
| <i>K00873</i> | high-metabotype-depleted   | 0.10409304 | central |

Table S3. Compound-specific mass spectrometer Multiple reaction monitoring settings

|                               | <b>Retention time (min)</b> | <b>Precursor ion (m/z)</b> | <b>Product ion (m/z)</b> | <b>Product ion (m/z)</b> |
|-------------------------------|-----------------------------|----------------------------|--------------------------|--------------------------|
| <b>Hydroxycamptothecin-d5</b> | 1.94                        | 587.3                      | 167.2                    | 167.2                    |
| <b>SN-38</b>                  | 2.141                       | 393                        | 349                      | 293                      |
| <b>SN-38G</b>                 | 1.738                       | 569                        | 393                      | 349                      |

Table S4. Variance in triplicate injections of SN-38 and SN-38G per sample

| <i>Sample</i> | <i>SN38 (SD) (n = 3)</i> | <i>SN38G (SD) (n = 3)</i> |
|---------------|--------------------------|---------------------------|
| A             | 0.003026549              | 0.829667036               |
| B             | 0.026210685              | 0.261309038               |
| C             | 0.01                     | 1.434428542               |
| D             | 0.005773503              | 0.531716318               |
| E             | 0.002554082              | 0.887269127               |
| F             | 0.047604237              | 0.296118377               |
| G             | 0.00668431               | 0.505880147               |
| H             | 0.025466056              | 0.003026549               |
| I             | 0.066109228              | 0.003026549               |
| J             | 3.840810763              | 0.003026549               |
| K             | 0.289087224              | 1.48280292                |
| L             | 0.030989245              | 0.003026549               |
| M             | 0.013501111              | 0.003026549               |
| N             | 0.033882493              | 0.003026549               |
| O             | 0.043321473              | 0.003026549               |
| P             | 0.010128343              | 0.003026549               |
| Q             | 0.093771638              | 0.003026549               |
| R             | 0.084994235              | 0.003026549               |
| S             | *                        | *                         |
| T             | 2.287552275              | 0.003026549               |

\* 1 time-point

## Supplementary References

1. Wallace, B. D. *et al.* Alleviating cancer drug toxicity by inhibiting a bacterial enzyme. *Science* **330**, 831–5 (2010).
2. Segata, N. *et al.* Metagenomic microbial community profiling using unique clade-specific marker genes. *Nat. Methods* **9**, 811–4 (2012).
3. Parks, D. H., Tyson, G. W., Hugenholtz, P. & Beiko, R. G. STAMP: statistical analysis of taxonomic and functional profiles. *Bioinformatics* **30**, 3123–4 (2014).
4. Feng, Q. *et al.* Gut microbiome development along the colorectal adenoma–carcinoma sequence. *Nat. Commun.* **6**, 6528 (2015).
